# 1 **Spectral slope and neural complexity as robust markers of task demand** 2 **and brain state during sleep and wakefulness**

3 Christopher Höhn<sup>1,2</sup>, Michael A. Hahn<sup>3</sup>, Janna D. Lendner<sup>3</sup> & Kerstin Hoedlmoser<sup>1,2</sup>

4 <sup>1</sup>Laboratory for Sleep, Cognition and Consciousness Research, Department of Psychology, University  
5 of Salzburg, Salzburg, Austria

6 <sup>2</sup>Centre for Cognitive Neuroscience Salzburg (CCNS), University of Salzburg, Salzburg, Austria

7 <sup>3</sup>Hertie-Institute for Clinical Brain Research, University Medical Center Tübingen, Tübingen, Germany

## 8 **Abstract**

9 Spectral slope and neural complexity are affected in many neurophysiological disorders such as ADHD,  
10 autism or epilepsy and are modulated by sleep, anesthesia, and aging. Yet, these two parameters are  
11 rarely studied in relation to each other. Here, we evaluated the effects of sleep stage and task demands  
12 on spectral slope and neural complexity within a narrow- (30 – 45Hz) and broadband (3 – 45Hz)  
13 frequency range in 28 healthy male adults ( $21.54 \pm 1.90$  years) over three consecutive recordings with  
14 a set of tasks (resting, attention and memory). We show that the slope steepens, and complexity  
15 decreases from wakefulness to N3. Importantly, slope and complexity are not only modulated by sleep  
16 but also differ between tasks, with flatter slopes and higher complexity being associated with more  
17 demanding tasks. While the slope and complexity are strongly correlated within 3 – 45Hz, we observe  
18 a functional dissociation in the 30 – 45Hz range. Critically, only the narrowband slope is steepest during  
19 REM sleep and associated with better task performance in a Go/Nogo task. Our results demonstrate  
20 that both markers are powerful indices of sleep depth, task demand and cognitive performance.  
21 However, depending on the frequency range, they provide distinct information about the underlying brain  
22 state.

## 23 **Introduction**

24 To date, neural oscillations are still the most prominent electrophysiological signature of human  
25 brain activity. For instance, wakeful resting is typically characterized by pronounced alpha-band activity  
26 (8 – 12Hz), which is suppressed in active task engagement (Kirstein, 2007; Klimesch et al., 1993;  
27 Klimesch, 1999). During sleep, different stages are best described by characteristic oscillatory events  
28 like sleep spindles and slow oscillations (Davis et al., 1938; Richard et al., 2012; Terzano et al., 2002).  
29 However, recent evidence suggests that irregular and aperiodic brain activity by means of neural  
30 complexity (Lempel & Ziv, 1976 and Welch, 1984) and the spectral exponent  $\beta$  (i.e., the magnitude of  
31 decay in power with increasing frequency; He, 2014), also carries meaningful information about different  
32 brain states. Specifically, the spectral exponent has been discussed as a marker of the brain's excitation  
33 and inhibition (E/I) balance (Gao et al., 2017), which is impaired in a variety of clinical conditions such  
34 as the attention deficit hyperactivity disorder (ADHD, Karalunas et al., 2022; Robertson et al., 2019),  
35 autism (Gao & Penzes, 2015; Rubenstein & Merzenich, 2003) and epilepsy (Symonds, 1959; Wong,  
36 2010). In addition, epilepsy has further been associated with alterations in neural complexity (Aarabi &  
37 He, 2012; Zhu et al., 2017).

38 Conceptually, the spectral exponent and neural complexity are regarded as two distinct  
39 measures as they are derived by different analytical approaches from the underlying electrophysiological  
40 signal. Neural complexity computed as Lempel-Ziv-Welch complexity (Welch, 1984) expresses the  
41 regularity and compressibility of a signal in time-domain (Lau et al., 2022) and is thought to be still  
42 strongly influenced by oscillatory activity (González et al., 2022; Tosun et al., 2019). In contrast, the  
43 spectral exponent reflects the absolute value of the slope (i.e., steepness) of a signal's power spectrum  
44 in frequency-domain, which is thought to be mainly aperiodic (Donoghue et al., 2020). In the following,  
45 we always use and refer to the spectral slope instead of the spectral exponent (which would be the  
46 absolute value of the slope) in order to avoid any ambiguity due to different terms that are often used to  
47 describe the same parameter (e.g.,  $1/f$  signal and scale free or aperiodic activity).

48 Despite the apparent differences between the spectral slope and neural complexity, the  
49 literature suggests that both can capture changes in brain states in a surprisingly similar fashion.  
50 Regarding consciousness and sleep, multiple studies showed that the spectral slope steepens (i.e.,  
51 becomes more negative) during anesthesia compared to wakefulness (Colombo et al., 2019; Gao et al.,  
52 2017; Lendner et al., 2020; Waschke et al., 2021), while others showed the same pattern for neural  
53 complexity, which also decreases from wakefulness to anesthetized states (Ferenets et al., 2007; Zhang  
54 et al., 2001). This mirrors findings of the transition from wakefulness to sleep, where spectral slope  
55 (Lendner et al., 2020; Ma et al., 2018; Miskovic et al., 2019; Pereda et al., 1998) and neural complexity  
56 (Andrillon et al., 2016; Schartner et al., 2017) both decrease with increasing sleep depth (i.e., from  
57 wakefulness to N3 sleep). Besides changes in consciousness, recent evidence from Waschke et al.  
58 (2021) further suggests that the spectral slope can even track the level of attention, whereby higher  
59 levels of attention and quicker response times are indexed by flatter slopes. This is in line with findings  
60 from other studies, which showed that the slope is indicative of cognitive processing speed (Ouyang et  
61 al., 2020; Pathania et al., 2022) and modulated by cognitive decline in ageing (Dave et al., 2018; Voytek  
62 et al., 2015; Voytek & Knight, 2015). Interestingly, Mediano et al. (2020) recently showed that higher  
63 neural complexity values also relate to faster reaction times on a trial-by-trial basis, thus likewise serving  
64 as a proxy of attention or processing speed.

65 With respect to the influence of different frequency contents on the estimation of the spectral  
66 slope and neural complexity, no optimal frequency settings are established yet for any of the two  
67 parameters. The heterogeneity of frequency content on which the calculations of both measures are  
68 based might be responsible for some disparate results in the current literature, thus further hampering  
69 our understanding of the contribution of aperiodic brain activity to healthy brain functioning. For instance,  
70 González et al. (2022) suggest that particularly for neural complexity, lower frequencies ( $\leq 12\text{Hz}$ ) are  
71 more informative than higher frequencies when differentiating between sleep and wakefulness. For the  
72 estimation of the spectral slope, researchers have argued either in favor of broadband (Karalunas et al.,  
73 2022; Podvalny et al., 2015; Waschke et al., 2021) or narrowband (Gao et al., 2017; Lendner et al.,  
74 2020) frequency ranges. While broadband ranges encompass more of the total signal power and result  
75 in better overall slope-fits (Donoghue et al., 2020; Gerster et al., 2022), narrowband ranges are less  
76 affected by low-frequency oscillatory activity and are therefore reflecting mostly pure aperiodic activity  
77 (Gao et al., 2017; Lendner et al., 2020).

78           Taken together, the slope and complexity research findings suggest a functional overlap of  
79 neural complexity and spectral slope in tracking different brain states. However, to date a direct  
80 comparison of these two measures across different brain states during sleep and wakefulness is still  
81 missing. Thus, the relationship between slope and complexity across different brain states still remains  
82 unclear as it has only been compared between rested wakefulness and anesthesia so far (Medel et al.,  
83 2020). Additionally, little is known about the sensitivity of the spectral slope and neural complexity to  
84 changes in brain activity during wakefulness in general. As potential markers of arousal and attention,  
85 the two parameters might likely be so affected by varying levels of task demands, which require different  
86 amounts of cognitive resources. Finally, it is unclear how the two measures are affected by selecting  
87 different frequency contents for their calculation.

88           Here, we leverage an expansive, within-subject design with multiple sleep and wake recordings  
89 to investigate (1) whether the spectral slope and neural complexity are modulated by different brain  
90 states during sleep and wakefulness and (2) to what extent they are related to each other as well as  
91 their functional significance for cognition. Using multiple recording sessions per subject, we try to  
92 overcome a limitation of most previous research that only relies on single session recordings, thus,  
93 limiting insights into the robustness of the observed effects. First, we assess the performance of the  
94 spectral slope and neural complexity in delineating sleep from wakefulness. Second, we investigate the  
95 influence of task demands on both measures by increasing task difficulty from simple resting sessions  
96 to an auditory attention (Go/Nogo) and a declarative memory task. Third, we analyze the relationship  
97 between the spectral slope and neural complexity across brain states and tasks using either narrow- or  
98 broadband frequency ranges for estimation. Finally, we probe whether the two parameters track  
99 behavioral performance in the Go/Nogo and declarative memory tasks.

## 100 **Results**

101           We utilized the data from a recently published study (Höhn et al., 2021; Schmid et al., 2021)  
102 that investigated the effects of different light conditions on alertness, sleep and memory consolidation.  
103 The subjects underwent the same experimental protocol on three different days under highly controlled  
104 and standardized lighting conditions. On three consecutive experimental nights, multiple tasks were  
105 conducted before and after sleep, including two resting sessions with either eyes closed or open, an  
106 auditory attention task (Go/Nogo) and a declarative memory task (cf., Figure 1A). We calculated spectral  
107 slopes and neural complexity (using Lempel-Ziv complexity) for all sleep stages and tasks in a narrow-  
108 (30 – 45Hz) and broadband (3 – 45Hz) frequency range (cf., Figure 1B and C).

### (A) Study Protocol

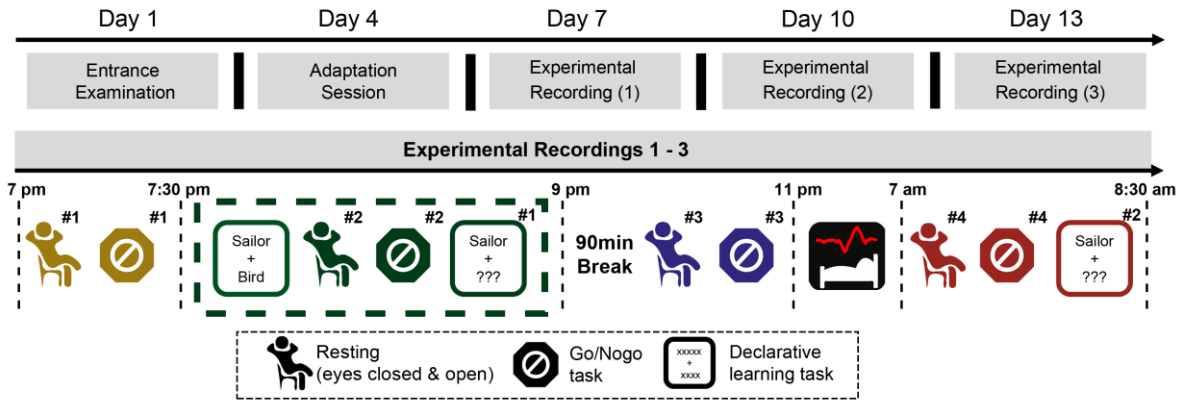

### (B) Spectral Slope

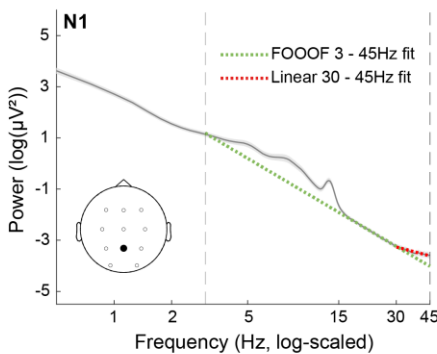

### (C) Neural Complexity

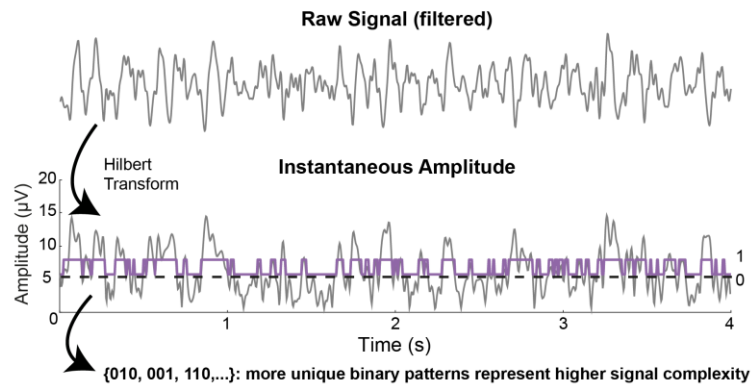

109

110 **Figure 1.** (A): Overview of the experimental protocol. EEG was recorded throughout all tasks and during sleep (with

111 full-night polysomnography) on the experimental days 7, 10 and 13. The tasks, which are highlighted by a dashed,

112 dark-green rectangle were primarily used to analyze the effects of task demand. The adaptation session only served

113 familiarization purposes and was not considered in any of the analyses. Results from the entrance examination

114 questionnaires are presented in Supplementary file – Table 1. (B): Example of the spectral slope estimation during

115 N1 sleep. For illustration purposes, data is shown for the electrode Pz averaged over all subjects and sleep

116 recordings. The spectral slope was fitted within 3 – 45Hz (broadband, dashed green line) and 30 – 45Hz

117 (narrowband, dashed red line). (C): Schematic overview of the neural complexity calculation based on a random 4s

118 epoch from electrode Pz of a subject during resting with closed eyes. First, the raw signal, filtered within the broad-

119 or narrowband frequency range (in this case within the 3 – 45Hz broadband range), is Hilbert transformed. Second,

120 the resulting data is binarized around its median amplitude and stored as a vector of zeros and ones. Lastly, the

121 Lempel-Ziv-Welch algorithm (Welch, 1984) is applied on this binary sequence in order to obtain a neural complexity

122 value, which is driven by the number of unique repetitions of ones and zeros.

### 123 Spectral slope and neural complexity delineate brain states during sleep

124 First, we strived for replicating previous findings, which showed that sleep stages could be

125 differentiated solely based on the spectral slope and neural complexity. The effect of sleep stage was

126 assessed for the spectral slope and neural complexity in each frequency range (30 – 45Hz and 3 –

127 45Hz) with semi-parametric Wald-Type Statistics (WTS; Friedrich et al., 2019) averaged over all

128 electrodes while considering the three repeated measurements.

129 The narrowband (30 – 45Hz) spectral slope model ( $WTS(4) = 133.57, p < .001$ ) and the neural

130 complexity model ( $WTS(4) = 14.11, p = .030$ ) both indicated significant modulations by sleep stage. In

131 line with previous research, the narrowband slope was significantly steeper in all sleep stages compared

132 to wakefulness with the steepest slope during REM sleep. In contrast, the narrowband neural complexity  
133 slightly increased from wake to sleep and showed a diverging pattern in comparison to the spectral  
134 slope (see Figure 2). When the broadband (3 – 45Hz) frequency range was used for estimation, the  
135 effect of sleep stage was much more pronounced in both parameters (spectral slope:  $WTS(4) = 560.01$ ,  
136  $p < .001$ ; neural complexity:  $WTS(4) = 601.92$ ,  $p < .001$ ). Both, the broadband slope and complexity  
137 significantly decreased from shallow (N1) to deep NREM sleep (N3). For REM sleep, however, both  
138 markers increased again in remarkably similar ways (see Figure 3), arguably reflecting more wake-like  
139 brain activity in the broadband range.

140 We found no significant effects of the repeated measurements (all  $p_{adj.} \geq .166$  after correcting  
141 for multiple comparisons), revealing that the effect of sleep stage robustly emerged in all individual  
142 recordings per subject. To evaluate the topographical distribution of the spectral slope and neural  
143 complexity, we additionally ran a multivariate pattern analysis (MVPA) with multi-class linear  
144 discriminant analyses (LDA). With this MVPA, we quantified how well the sleep stages could be decoded  
145 by taking the topographical distribution of the slope and complexity values into account. In both  
146 frequency ranges and for both parameters, classification accuracies were always significantly above  
147 chance level (20%,  $p < .001$ ) and in general higher for the broadband (3 – 45Hz) than for the narrowband  
148 (30 – 45Hz) frequency range ( $WTS(1) = 643.36$ ,  $p < .001$ ). For both frequency ranges, the spectral  
149 slope was more informative about the underlying brain state (i.e., yielded higher classification  
150 accuracies) than the neural complexity ( $WTS(1) = 123.88$ ,  $p < .001$ ), especially in the narrowband range  
151 (spectral slope: 31.83%, neural complexity: 22.67%; see Figure 3 – Figure Supplement 1).

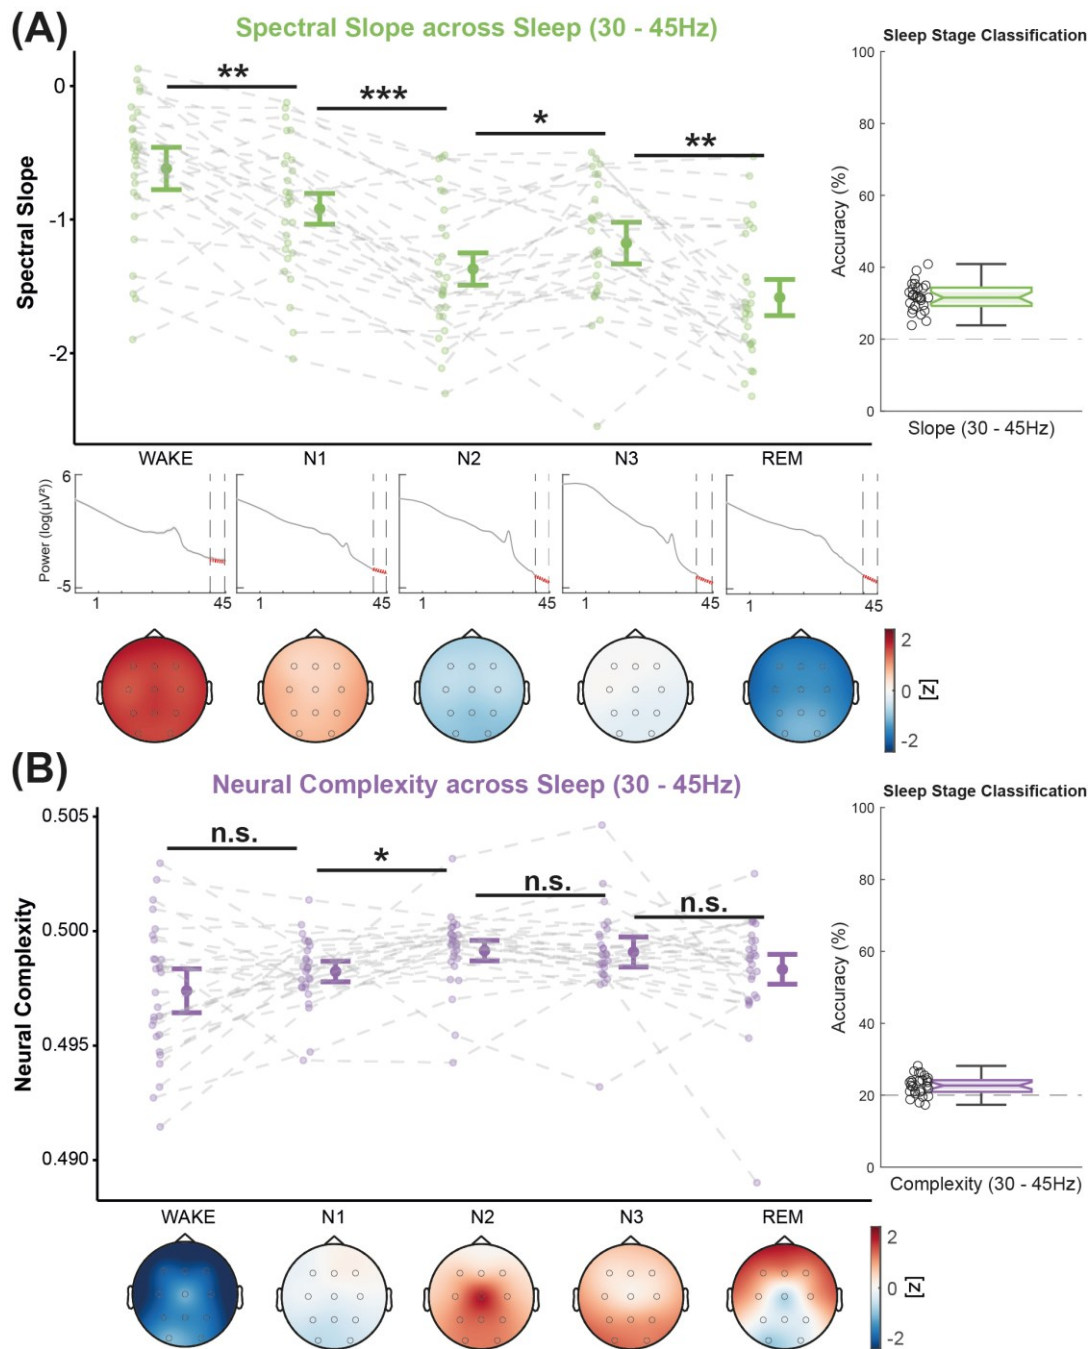

152  
153  
154  
155  
156  
157  
158  
159  
160  
161  
162

**Figure 2.** Spectral slope (green, A) and neural complexity (purple, B) from 30 – 45Hz across sleep, averaged over all lab-sessions per subject. Center figures show the data averaged over all electrodes and topographical maps are provided below (color-coding refers to z-values of slope or complexity computed from the grand average across all sleep stages). In (A), the power spectra in log-log space are provided for each sleep stage to illustrate the narrowband slope changes across different sleep stages. Classification accuracies are shown on the right-hand side. A: The spectral slope decreases from wakefulness across all sleep stages to REM sleep with a small temporary increase during N3 sleep. B: Neural complexity increases from shallow N1 to light N2 sleep and is in general less modulated by sleep stages than the spectral slope. \*\*\*:  $p < .001$ , \*\*:  $p \leq .010$ , \*:  $p \leq .050$ , n.s.:  $p > .050$ ; all p-values are adjusted for multiple comparisons; error-bars represent 95% confidence intervals ( $N = 27$ ).

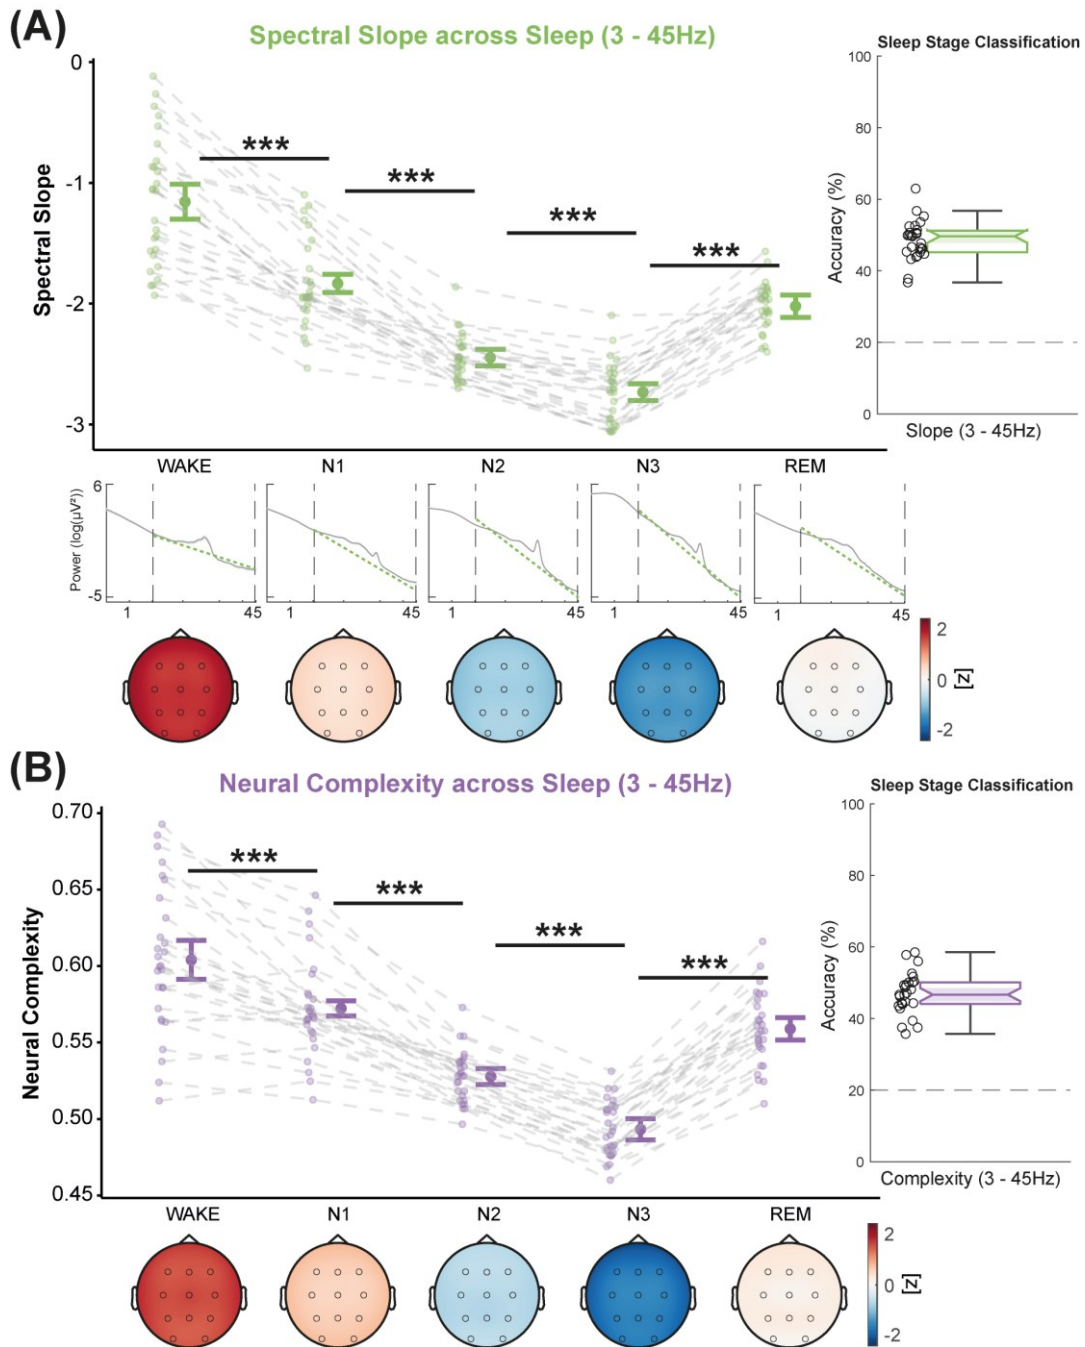

163

164 **Figure 3.** Spectral slope (green, A) and neural complexity (purple, B) from 3 – 45Hz across sleep, averaged over  
 165 all lab-sessions per subject. Center figures show the data averaged over all electrodes and topographical maps are  
 166 provided below (color-coding refers to z-values of slope or complexity computed from the grand average across all  
 167 sleep stages). In (A), the log-log power spectra for each sleep stage are provided to illustrate the broadband slope  
 168 differences across sleep stages. Classification accuracies are shown on the right-hand side. (A): Spectral slope  
 169 steepens from wakefulness to N3 sleep but flattens to some extent during REM sleep. (B): Neural complexity shows  
 170 the same pattern as the spectral slope and likewise decreases from wakefulness to N3 with a subsequent increase  
 171 in REM sleep. \*\*\*:  $p < .001$ , \*\*:  $p \leq .010$ , \*:  $p \leq .050$ , n.s.:  $p > .050$ ; p-values are adjusted for multiple comparisons;  
 172 error-bars represent 95% confidence intervals ( $N = 27$ ).

173 **Figure 3: Supplement 1.** Direct comparison of the classification accuracies across sleep between neural  
 174 complexity and spectral slope for the narrow- (30 – 45Hz) and broadband (3 – 45Hz) frequency ranges.

175

## 176 Spectral slope and neural complexity vary as a function of task demand

177 Next, we investigated whether spectral slope and neural complexity track varying levels of task  
178 demand. We calculated both markers from resting sessions with eyes closed (REC) and eyes open  
179 (REO), an auditory Go/Nogo task (GNG), an encoding session (ENC) from a declarative memory task  
180 as well as its according retrieval session (RET). For these analyses, we focused on the task data from  
181 the evening recordings (see dashed dark-green rectangle in Figure 1A). Theoretically, task demands  
182 should have been comparable between resting sessions with closed and open eyes, whereas the  
183 Go/Nogo and encoding tasks were considered to be more demanding since they required active task  
184 participation and higher cognitive control. The retrieval task was deemed to be the most challenging as  
185 it was necessary to make an additional active memory recall as quickly as possible.

186 In the narrowband frequency range (30 – 45Hz), we observed a significant flattening (i.e., values  
187 closer to zero) of the slope ( $WTS(4) = 56.64, p < .001$ ) but a decrease in complexity ( $WTS(4) = 199.55,$   
188  $p < .001$ ) with increasing task demands (see Figure 4). The flattening of the narrowband spectral slope  
189 was most pronounced when contrasting resting states with the Go/Nogo (REC vs. GNG:  $WTS(1) =$   
190  $21.05, p_{adj.} < .001$ ; REO vs. GNG:  $WTS(1) = 16.53, p_{adj.} = .001$ ) and encoding (REC vs. ENC:  $WTS(1)$   
191  $= 20.73, p_{adj.} < .001$ ; REO vs. ENC:  $WTS(1) = 15.56, p_{adj.} = .001$ ) sessions. However, further flattening  
192 of the slope was observable during the retrieval task (GNG vs. RET:  $WTS(1) = 6.44, p_{adj.} = .021$ ; ENC  
193 vs. RET:  $WTS(1) = 13.66, p_{adj.} = .001$ ). The narrowband neural complexity did not differ between the  
194 resting and Go/Nogo sessions (all  $p_{adj.} > .110$ ) but decreased from the Go/Nogo to the encoding session  
195 (GNG vs. ENC:  $WTS(1) = 16.64, p_{adj.} < .001$ ) and was lowest during retrieval (GNG vs. RET:  $WTS(1)$   
196  $= 98.74, p_{adj.} < .001$ , ENC vs. RET:  $WTS(1) = 31.11, p_{adj.} < .001$ ).

197 When investigating the broadband frequency range (3 – 45Hz), we found that the diverging  
198 pattern between spectral slope and neural complexity disappeared and both parameters were  
199 increasing (i.e., higher complexity values and flatter slopes indexed by less negative values) across  
200 tasks (Slope:  $WTS(4) = 101.04, p < .001$ ; Complexity:  $WTS(4) = 80.28, p < .001$ ; see Figure 5). In the  
201 broadband frequency range, neural complexity also differed between the two resting sessions (eyes  
202 closed and eyes open), likely reflecting a difference in alpha power (8 – 12Hz) between the two  
203 conditions, thus supporting a greater influence of oscillations on estimates of neural complexity. Again,  
204 we did not observe any effects of the repeated measurements (all  $p_{adj.} \geq .252$ ).

205 During wakefulness, the MVPA results indicated an above chance classification performance  
206 for all tasks (20%,  $p < .001$ ). Similar to the results during sleep, classification accuracy was higher when  
207 using the broadband instead of the narrowband frequency range ( $WTS(1) = 397.08, p < .001$ ). The  
208 spectral slope was again more informative in the narrowband range (Slope: 35.03%, Complexity:  
209 25.98%,  $WTS(1) = 71.93, p < .001$ ) while the complexity yielded better results in the broadband range  
210 (Slope: 48.10%, Complexity: 52.69%,  $WTS(1) = 13.61, p = .002$ ; see Figure 5 – Figure Supplement 1).



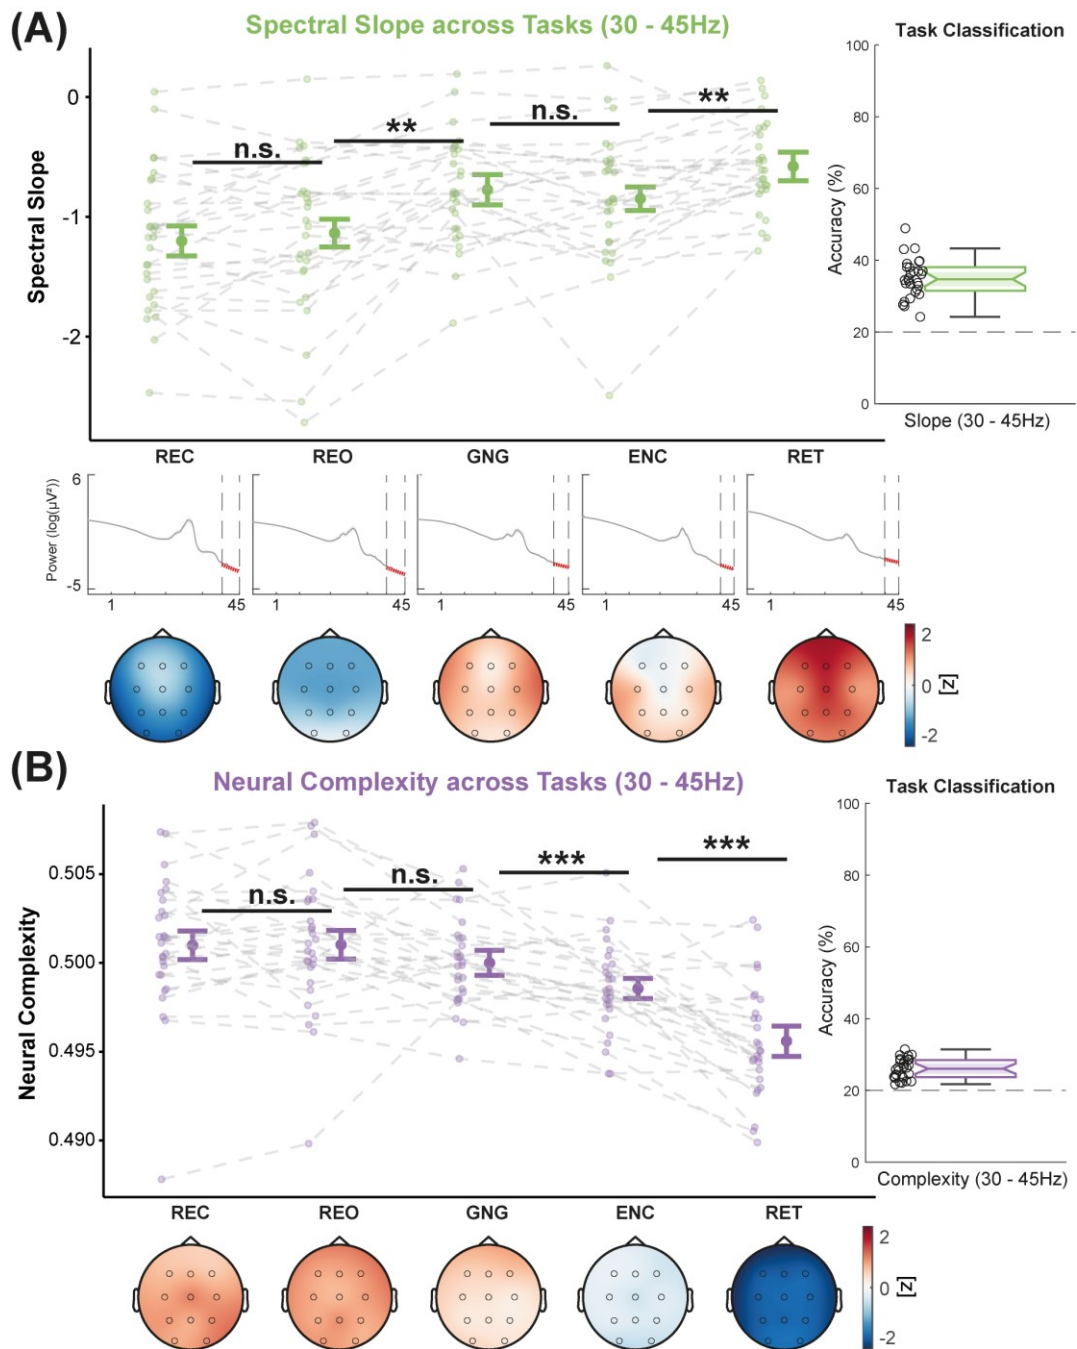

211

212 **Figure 4.** Spectral slope (green, A) and neural complexity (purple, B) from 30 – 45Hz across tasks, averaged over  
 213 all lab-sessions per subject. Center figures show the data averaged over all channels and topographical maps are  
 214 provided below (color-coding refers to z-values of slope or complexity computed from the grand average across all  
 215 tasks). In (A), the log-log power spectra for each task are provided to illustrate narrowband slope differences across  
 216 tasks. Classification accuracies are shown on the right-hand side. (A): The slope flattens with increasing task  
 217 demands but does not differ between the resting or the Go/Nogo and encoding sessions. (B): Neural complexity  
 218 decreases across tasks and is minimal during the retrieval session. \*\*\*:  $p < .001$ , \*\*:  $p \leq .010$ , \*:  $p \leq .050$ , n.s.:  $p >$   
 219  $.050$ ; p-values adjusted for multiple comparisons; error-bars show 95% confidence intervals ( $N = 28$ ).

220 **Figure 4: Supplement 1.** Slope and complexity from 30 – 45Hz across tasks averaged over all timepoints.

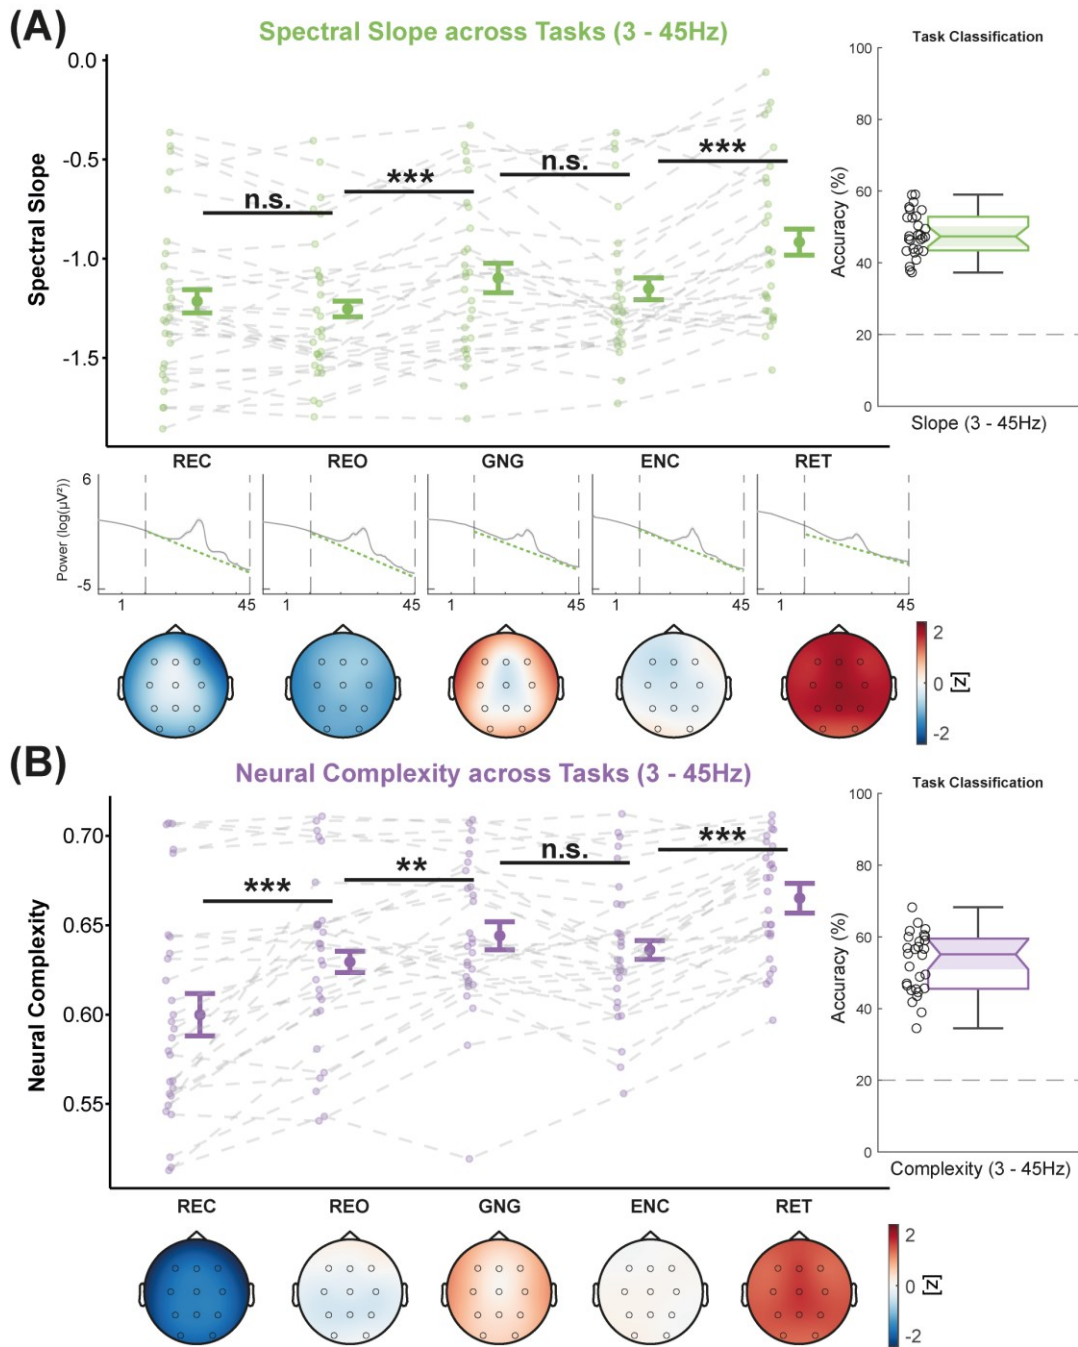

221  
 222 **Figure 5.** Spectral slope (green, A) and neural complexity (purple, B) from 3 – 45Hz across tasks, averaged over  
 223 all lab-sessions per subject. Center figures show the data over all channels and topographical maps are provided  
 224 below (color-coding refers to z-values of slope or complexity computed from the grand average over all tasks). In  
 225 (A), the log-log power spectra for each sleep stage are provided to illustrate broadband slope differences across  
 226 tasks. Classification accuracies are shown on the right-hand side. (A): The slope flattens from the resting to the  
 227 Go/Nogo sessions and is flattest during retrieval. (B): Neural complexity increases already from resting with closed  
 228 to open eyes and is further elevated in all active tasks, peaking during retrieval. \*\*\*:  $p < .001$ , \*\*:  $p \leq .010$ , \*:  $p \leq$   
 229  $.050$ , n.s.:  $p > .050$ ; p-values adjusted for multiple comparisons; error-bars show 95% confidence intervals ( $N = 28$ ).  
 230 **Figure 5: Supplement 1.** Comparison of the classification accuracies across tasks between neural complexity and  
 231 spectral slope for the narrow- (30 – 45Hz) and broadband (3 – 45Hz) frequency ranges.  
 232 **Figure 5: Supplement 2.** Slope and complexity from 3 – 45Hz across tasks averaged over all timepoints.  
 233 **Figure 5: Supplement 3.** Spectral slope and neural complexity between tasks after correcting for the resting eyes  
 234 open condition as baseline.

235 To control whether the results were confounded by the task order and thus solely reflect an  
236 increase in exhaustion or decrease in motivation, we repeated the analyses with the task data averaged  
237 over all available time points (cf., Figure 1A for all time points at which each task was conducted). These  
238 control analyses confirmed the same patterns as in the original analyses with a very similar flattening of  
239 the broad- and narrowband spectral slopes across tasks and an increase in broadband but a decrease  
240 in narrowband complexity with increasing task demands (see Figure 4 – Figure Supplement 1 and Figure  
241 5 – Figure Supplement 2).

242 An overview of the pairwise classification accuracies for all sleep stage and task pairings is  
243 presented in Supplementary file – Tables 2 and 3. All tasks and sleep stages could be differentiated  
244 above chance-level (50% in this context). As described above, the classification accuracy was in general  
245 higher for the broadband than the narrowband frequency range. However, in the narrowband frequency  
246 range, the accuracies for the spectral slope were consistently higher than for neural complexity.

247 Collectively, the results so far suggest that spectral slope and neural complexity are both  
248 sensitive markers, which can track brain state changes during sleep and wakefulness due to changes  
249 in sleep depth or because of varying levels of task demand and cognitive load. However, while the two  
250 parameters are modulated in remarkably similar ways when using a broadband frequency range (3 –  
251 45Hz), they express diverging patterns when a restricted narrowband frequency range (30 – 45Hz) is  
252 used. Therefore, we next assessed the relationship between spectral slope and neural complexity.

### 253 **Relationship between the spectral slope and neural complexity**

254 First of all, we assessed the robustness of the spectral slope and neural complexity estimations  
255 over the different recordings per subject. We correlated each parameter (in the narrow- and broadband  
256 frequency range) with itself between the different lab-sessions for each sleep stage and task. Between  
257 all lab-sessions, the parameters were strongly positively correlated, indicating a substantial overlap of  
258 information over the different recordings (see Supplementary file - Table 4). To identify the relationship  
259 between the spectral slope and neural complexity for each of the two frequency ranges, we further  
260 computed the correlations between the two parameters. In the broadband frequency range, the slope  
261 and complexity were consistently positively correlated across all sleep stages and tasks (see Figure 6A  
262 and B, right columns). However, this relationship vanished in the narrowband frequency range where  
263 the correlations between the two parameters were inconsistent and ranged from significant negative to  
264 positive ones (see Figure 6A and B, left columns). These results imply that the two parameters do not  
265 share a lot of information in the narrowband range. In contrast, the information is almost entirely  
266 redundant in the broadband frequency range. This fits well to our previous results (cf., Figures 2 – 5)  
267 where only the narrowband slope and complexity were differentially modulated by sleep stage and task  
268 demand.

269 Taken together, this suggests that the narrowband spectral slope and neural complexity actually  
270 track different features of brain activity that are only explicitly captured when using a restricted frequency  
271 range as for instance 30 – 45Hz. In broader frequency ranges, the dominance of other, especially lower  
272 frequencies might blur these effects, thus making them indistinguishable.

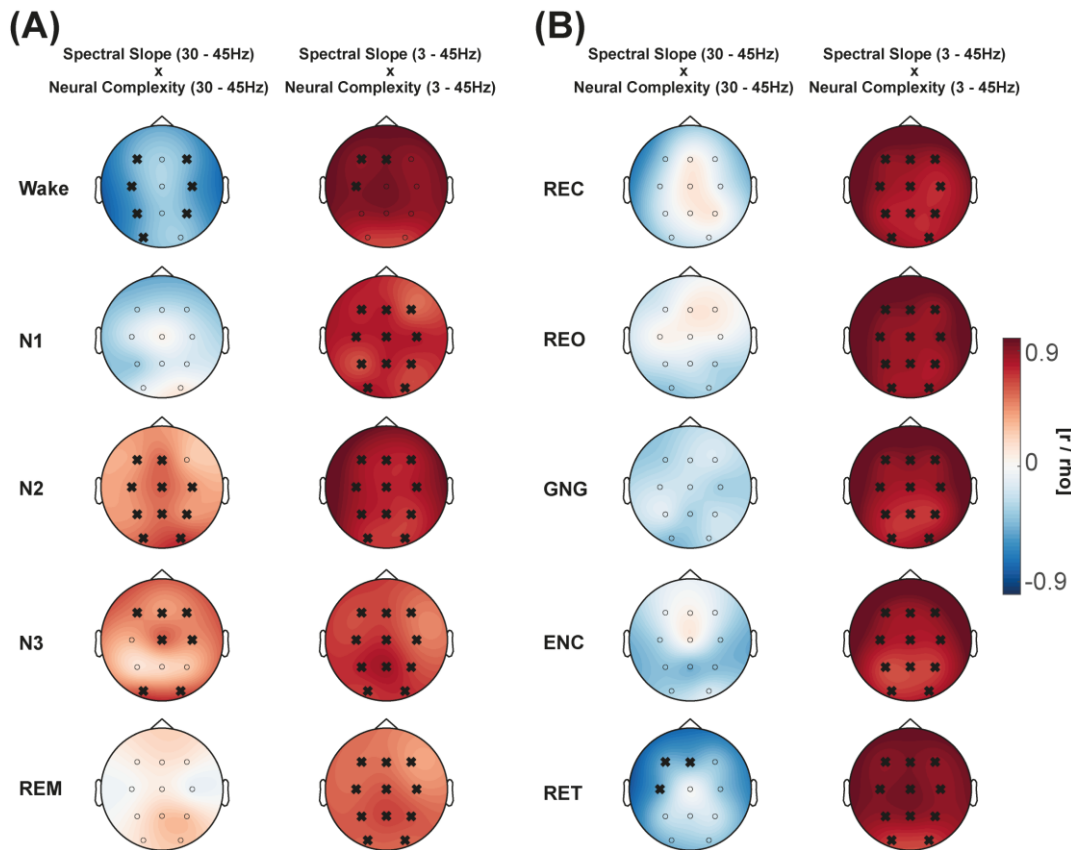

273

274 **Figure 6.** Summary of correlations between the spectral slope and neural complexity from 30 – 45Hz and 3 – 45Hz.  
 275 The sleep (A) and task (B) data per subject were averaged across all lab-sessions. For task data, only the evening  
 276 assessments highlighted by the dashed dark-green rectangle in Figure 1 were considered. Significant correlations  
 277 ( $p \leq .050$  after correcting for false discovery rate) are highlighted with a cross on the topographical maps (color  
 278 codes for the size and directionality of the correlation coefficients). The 30 – 45Hz slope and neural complexity  
 279 showed no consistent positive or negative relationship across tasks and sleep stages. In contrast, the 3 – 45Hz  
 280 slope and neural complexity were consistently positively correlated over all tasks and sleep stages ( $N = 28$ ).

281 **Figure 6: Supplement 1.** Correlation of the slope and complexity with themselves in the narrow- or broadband  
 282 frequency range during sleep (A) and wakefulness (B). Only the spectral slope was consistently positively correlated  
 283 with itself, whereas the complexity was slightly negatively correlated with itself between the two frequency ranges.

284 Lastly, we assessed how strongly the spectral slope and neural complexity were correlated with  
 285 themselves in the different frequency ranges. The narrow- and broadband slopes were always positively  
 286 correlated, whereas the opposite was true for neural complexity (see Figure 6 – Figure Supplement 1).  
 287 Thus, flatter narrowband slopes were usually associated with flatter slopes in the broadband range, but  
 288 lower narrowband complexity was often even associated with higher broadband complexity. This  
 289 suggests that especially the narrowband spectral slope might measure a facet of the underlying brain  
 290 activity that is not represented in the narrowband neural complexity.

## 291 The spectral slope as an electrophysiological marker of task performance

292 Having established that spectral slope and neural complexity are not only modulated by sleep  
 293 but also differ between tasks in a frequency range specific manner, we next investigated their  
 294 relationship with task performance. Thus, we correlated the spectral slope and neural complexity from  
 295 the narrow- and broadband frequency ranges during the Go/Nogo task with the according performance

296 scores (percentage of correct trials divided by median reaction time) over multiple sessions. Again, this  
297 allowed us to test the robustness of any correlations with behavior. Only flatter slopes in the narrowband  
298 range (30 – 45Hz) were consistently related to better task performance (see Figure 7). Neural  
299 complexity, on the other hand, did not correlate with performance, neither in the narrow- nor in the  
300 broadband (3 – 45Hz) range (see Figure 7 and Figure 7 – Figure Supplement 1). In the broadband  
301 range, the relationship with task performance was still consistently positive for both parameters but did  
302 not reach statistical significance. The fact that this positive relationship was strengthened and actually  
303 turned significant only for the slope in the narrowband range again suggests a distinct role of the  
304 narrowband slope, which might also be interpreted as a specific marker of task performance.

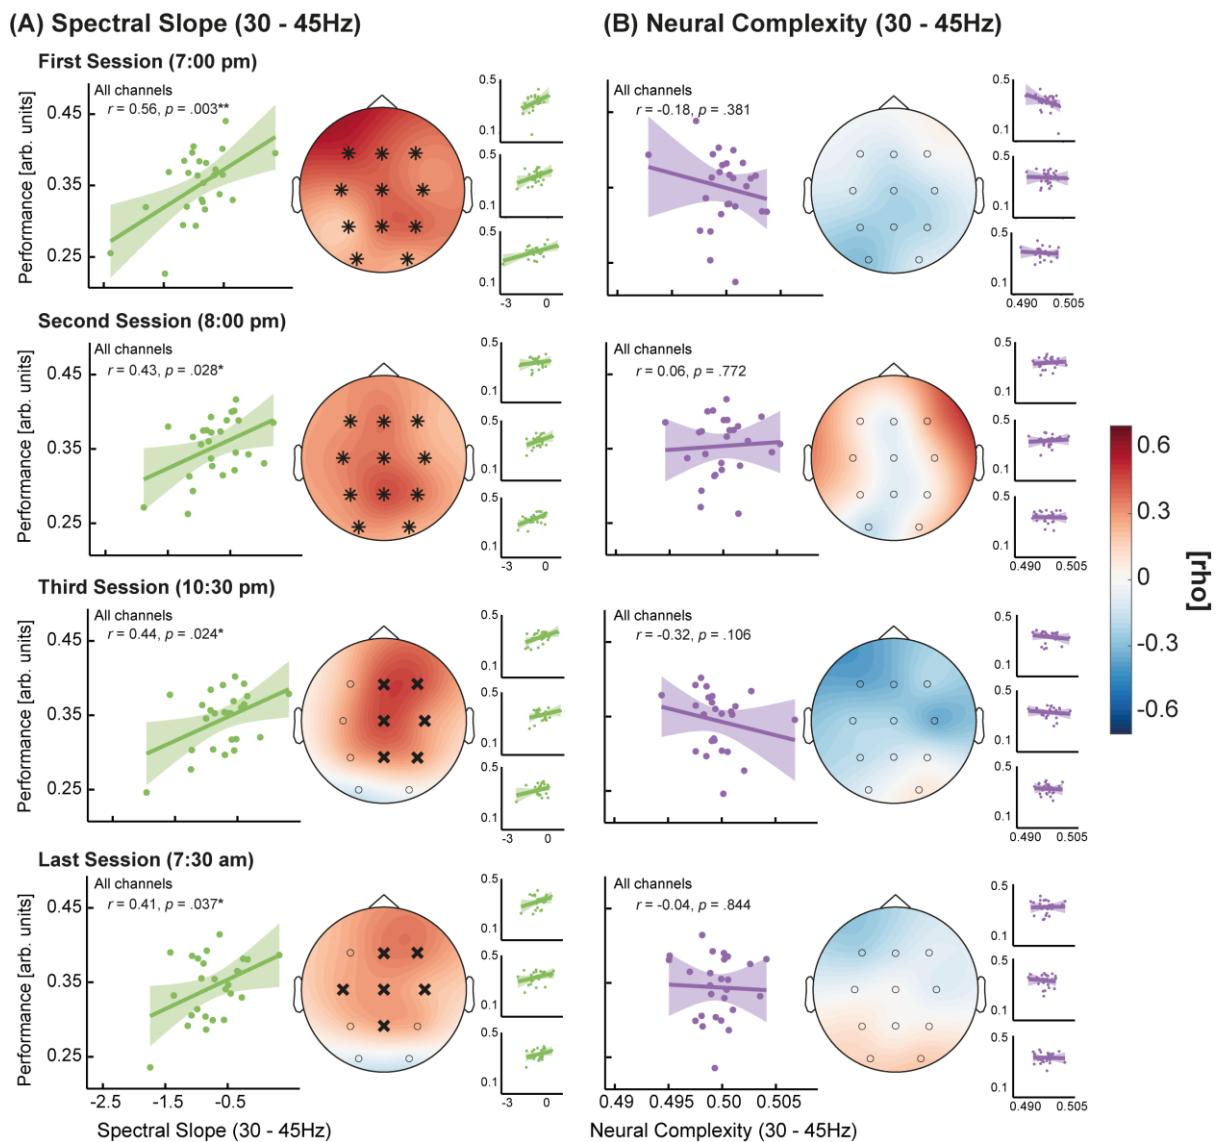

305  
306 **Figure 7.** Relationship between Go/Nogo task performance and spectral slope (A) or neural complexity (B) within  
307 30 – 45Hz across different assessment times. For the large scatterplots, the data was averaged across all lab-  
308 sessions (small scatterplots show the relationship in each lab-session). The topoplots depict the strength of the  
309 correlation for each electrode. Electrodes forming a significant cluster are highlighted with asterisks. Those showing  
310 a significant correlation after false discovery rate correction but did not from a significant cluster are marked with a  
311 cross. Only the narrowband spectral slope showed a consistent positive relationship with task performance ( $N =$   
312 26).

313 **Figure 7: Supplement 1.** Results when using the broadband (3 – 45Hz) frequency range. No significant  
314 relationships emerged for the spectral slope and neural complexity, even though the correlation was consistently  
315 positive for both parameters.

316 Next, we determined whether the narrowband spectral slope can even be used to track memory  
317 performance. Therefore, we correlated the spectral slope and neural complexity during the retrieval  
318 sessions of a declarative memory task with the recall performance scores (i.e., percentage of correctly  
319 recalled word pairs). Even though the overall pattern was similar to the Go/Nogo task, most correlation  
320 coefficients only showed a trend towards statistical significance (see Figure 8). Despite the lack of  
321 statistical significance on most electrodes, the narrowband spectral slope was again consistently  
322 positively correlated with recall performance. This indicates that flatter slopes, especially in the  
323 narrowband frequency range, are not only related to better attentional performance but might also  
324 benefit declarative memory. In contrast, the narrowband complexity was not positively correlated with  
325 memory performance and even expressed a negative relationship on some electrodes. Since we  
326 observed a positive relationship between overnight decreases in resting state slopes and memory  
327 performance in another study (Lendner et al., 2022), we further assessed whether the overnight change  
328 in slope during the retrieval task is also correlated with sleep-dependent memory consolidation.  
329 However, we did not obtain a significant relationship, indicating that while flatter slopes during the  
330 retrieval were associated with slightly better memory performance in the according session, overnight  
331 changes in the slope or complexity were not related to performance changes in our study.

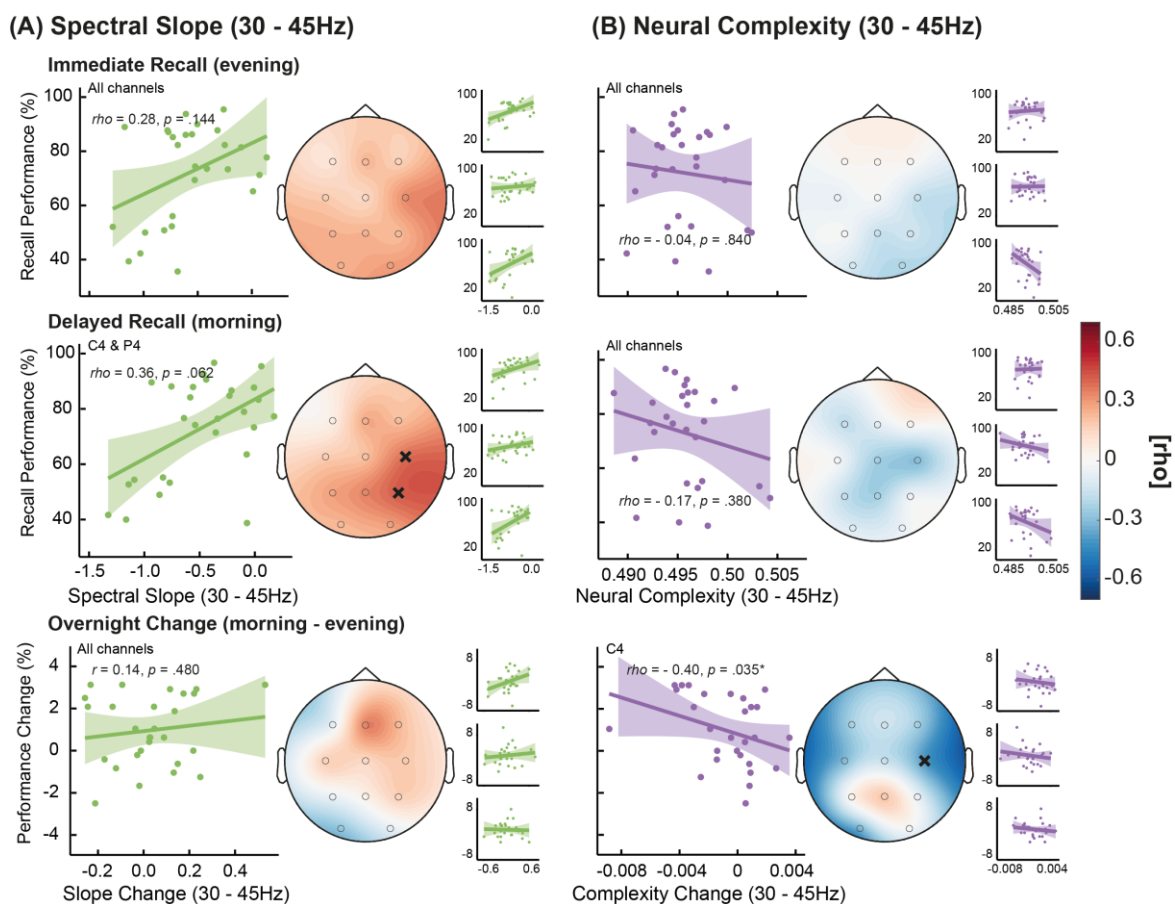

332 **Figure 8.** Relationship of declarative memory recall performance and spectral slope (A) or neural complexity (B)  
333 within 30 – 45Hz. Results are shown for the immediate recall during the evening and the delayed recall in the next  
334

335 morning as well as for the overnight change. For the large scatterplots, the data was averaged across all lab-  
336 sessions (small scatterplots show the relationship for each session). The topoplots represent the strength of the  
337 correlations on each electrode and color codes for the size and directionality of the correlation coefficients. Even  
338 though the spectral slope was consistently positively correlated with recall performance, no electrodes formed a  
339 significant cluster. Significant single electrodes that survived false discovery rate correction are highlighted with a  
340 cross ( $N = 28$ ).

341 **Figure 8: Supplement 1.** Results when using the broadband 3 – 45Hz frequency range. No relationship observable  
342 between recall performance and the slope or complexity.

343 In the broadband frequency range, both parameters did not show a consistent relationship with  
344 recall performance (see Figure 8 – Figure Supplement 1). Finally, we analyzed whether the similar  
345 results between the Go/Nogo and declarative memory task performance could be traced back to better  
346 overall attention and higher task engagement but there was no significant relationship between the  
347 performance scores from the two tasks (evening:  $\rho = 0.10$ ,  $p = .611$ ; morning:  $\rho = 0.06$ ,  $p = .766$ ).  
348 Thus, subjects that performed well in the Go/Nogo task did not necessarily achieve a high recall  
349 performance score in the declarative memory task.

## 350 Discussion

351 In this study comprising three experimental recordings with multiple measurements per subject,  
352 we demonstrated that the spectral slope and neural complexity both reliably delineate sleep stages and  
353 are modulated by task demand during wakefulness. Critically, we provided evidence that the correlation  
354 between spectral slope and neural complexity strongly depends on the frequency content, which alters  
355 their modulation across task demands and sleep stages. The narrowband (30 – 45Hz) spectral slope  
356 was best suited to differentiate REM sleep from wakefulness, even though the broadband (3 – 45Hz)  
357 slope and neural complexity were more strongly modulated by sleep stages in general. During  
358 wakefulness, increasing task demands are associated with flatter slopes in the narrow- and broadband  
359 range, but only with higher complexity in the broadband range. Critically, solely the narrowband spectral  
360 slope tracked task performance in an auditory attention task (Go/Nogo) as well as in a declarative  
361 memory task.

## 362 Sleep stage specific alterations of spectral slope and neural complexity

363 Our findings corroborate previous research which demonstrated that the spectral slope and  
364 neural complexity are sensitive markers of sleep depth (Abásolo et al., 2015; Bódizs et al., 2021;  
365 Lendner et al., 2020; Pascovich et al., 2022; Schartner et al., 2017; Tagliazucchi et al., 2013). Building  
366 upon these findings, we leveraged repeated EEG recordings per subject and confirmed that the two  
367 parameters can robustly differentiate all sleep stages from wakefulness. Overall, sleep stages could be  
368 better delineated when a broadband frequency range (3 – 45Hz) was used for calculation of the spectral  
369 slope and neural complexity. This is probably due to the fact that the broadband range encompasses  
370 the frequencies typically used for traditional sleep scoring, such as slow wave activity (0.5 – 4Hz) and  
371 sleep spindles (11 – 15Hz; Dijk, 1995), thereby increasing the sleep stage specific information in the  
372 underlying signal. However, only the spectral slope within the narrowband frequency range (30 – 45Hz)  
373 clearly distinguished REM sleep from all other sleep stages, which is in line with recent findings by

374 Lendner et al. (2020). This behavior of the narrowband spectral slope contradicted the overall  
375 modulation of slope and complexity in the broadband range, where both parameters showed a relative,  
376 more wake-like, increase during REM sleep. Since REM sleep (sometimes called ‘paradoxical sleep’;  
377 Peigneux et al., 2001 or Siegel, 2011) is characterized by wake-like, but non-oscillatory brain activity  
378 (Blumberg et al., 2020; Peever & Fuller, 2017), these disparate results between the two frequency  
379 ranges suggest that the narrowband slope mainly measures non-oscillatory, aperiodic brain activity. The  
380 relative increase in broadband complexity during REM sleep has been attributed to higher levels of  
381 conscious content that accompany vivid dreaming and thus require more complex brain activity than  
382 deeper, mostly dreamless sleep stages (Lau et al., 2022; Mateos et al., 2018).

383         Recent modeling work has also linked especially the narrowband spectral slope with the  
384 excitation to inhibition (E/I) balance in the brain (Gao et al., 2017). Within this framework, steeper slopes  
385 during REM sleep potentially reflect stronger inhibitory brain activity. This might allow the brain to  
386 decouple from its environment and, by maintaining muscle atonia, to enable the consolidation of  
387 emotional memories and the experience of vivid dreams (Aime et al., 2022) without the danger of acting  
388 them out. The narrowband (30 – 45Hz) complexity, however, expressed a diverging pattern compared  
389 to the narrowband slope and stayed almost constant across all sleep stages with even a slight increase  
390 from N1 to N2 sleep. Even though our study is the first to directly compare spectral slope and neural  
391 complexity during sleep, the congruency of both measures within the broadband frequency range might  
392 not be surprising, since previous studies investigating the parameters individually have shown their  
393 decrease across sleep (Aamodt et al., 2021; Lendner et al., 2020; Miskovic et al., 2019; Pereda et al.,  
394 1998; Schartner et al., 2017). Although we were able to classify sleep stages consistently above chance  
395 level with both parameters, it should be noted that our classifier was trained and tested only on our data.  
396 Furthermore, we did not compare the performance of the spectral slope and neural complexity to other  
397 potentially powerful biomarkers. Therefore, it would be interesting to see how accurate sleep stages can  
398 be scored exclusively by means of the slope or complexity and how the two markers perform in  
399 comparison to other indices of sleep depth like heart rate variability and blood pressure (Kuula &  
400 Pesonen, 2021; Mitsukura et al., 2020; Radha et al., 2019; van de Borne et al., 1994) or accelerometric  
401 data from actigraphy (Lüdtke et al., 2021; Sadeh et al., 1989) and multisensor consumer-wearables  
402 (Ameen et al., 2019; Boe et al., 2019; Roberts et al., 2020; Tal et al., 2017).

### 403 **Spectral slope and neural complexity are modulated by task demands**

404         In addition to our findings during sleep, we demonstrate that the spectral slope and neural  
405 complexity track different levels of task demands. That the slope and complexity are in general also  
406 modulated during wakefulness is in line with other research (Jacob et al., 2021; Mediano et al., 2021;  
407 Sheehan et al., 2018; Waschke et al., 2021), however, to our best knowledge this is the first study  
408 assessing the effect of task demand and the influence of different frequency ranges on the two  
409 parameters. Similar to sleep, we observed a homogenous modulation of the broadband (3 – 45Hz) slope  
410 and complexity, where flatter slopes and higher complexity were associated with an increase in task  
411 demands. This pattern was identical for the narrowband slope but was inverted for the narrowband  
412 complexity, where higher task demands were accompanied by decreasing levels of complexity. In the  
413 E/I balance framework, flatter narrowband slopes are the result of higher excitation in the brain (Chini et



414 al., 2022; Gao et al., 2017). Thus, our observed pattern of a flattening of the spectral slope with  
415 increasing task demands seems plausible as more difficult tasks require more cognitive resources and  
416 therefore lead to stronger excitatory brain activity (Harris & Thiele, 2011; He, 2011; Kanashiro et al.,  
417 2017). Unlike Waschke et al. (2021), who reported a stronger occipital flattening of the slope in a visual  
418 compared to an auditory task, we did not observe clear topographical differences between modalities,  
419 even though the attentional Go/Nogo task was entirely auditory except for a fixation-cross whereas the  
420 declarative memory task mainly relied on visual content. However, this lack of topographical  
421 distinctiveness might be due to a partial overlap between involved brain areas since both, auditory  
422 discrimination and learning involve frontotemporal brain regions (Ackerman, 1992; Halsband, 1998).

### 423 **Differential contributions of narrow- and broadband frequency ranges**

424 Based on the results from the broadband frequency range, it is tempting to assume that the  
425 spectral slope and neural complexity are indexing the same or at least very similar features of brain  
426 activity. Indeed, according to Medel et al. (2020), both parameters might actually be driven by the  
427 transition entropy of the underlying cortical system and flatter slopes as well as lower complexity values  
428 could be similarly characteristic of the same cortical states. However, the divergence between the  
429 narrow- and broadband slope and complexity during sleep and wakefulness clearly demonstrates that  
430 the two parameters cannot be used interchangeable. Instead, especially in a restricted frequency range,  
431 they track different facets of the underlying brain activity. Here, we revealed that this selected frequency  
432 range dramatically influences the information that the two parameters provide and therefore also their  
433 interrelation. Using a narrowband frequency range from 30 – 45Hz for estimation decreases the  
434 relationship between the spectral slope and neural complexity. During wakefulness, different  
435 contributions of oscillatory and aperiodic brain activity to the slope and complexity could account for their  
436 diverging patterns in the narrowband range. Although it appears paradoxical that flatter narrowband  
437 slopes, representing an increase in aperiodic activity, should be accompanied by a decrease in neural  
438 complexity, others have also reported this type of counterintuitive behavior of neural complexity.  
439 Mediano et al. (2021) showed that in MEG within 0.5 – 30Hz, active tasks actually exhibited lower  
440 complexity values compared to rested wakefulness. In addition, a recent review from Lau et al. (2022)  
441 discussed several studies that reported apparently contradicting modulations of neural complexity in  
442 different clinical conditions, where some report lower and others higher levels of complexity. Thus, the  
443 question whether higher neural complexity can always be clearly interpreted as more complex or  
444 irregular brain activity remains unclear. So far, the best explanation for the contradictory findings in the  
445 neural complexity literature is that higher complexity values can both represent either more complex or  
446 more random systems (La Torre-Luque et al., 2016), which makes it difficult to argue whether higher  
447 complexity always represents a healthier neurophysiological brain state. Interestingly, other studies also  
448 showed a strong relationship between different complexity or entropy measures and the spectral slope  
449 (Colombo et al., 2019; Miskovic et al., 2019; Waschke et al., 2017), thus, it would be interesting to  
450 investigate in the future what drives their shared information and under which circumstances (i.e.,  
451 frequency ranges) this relationship vanishes.

### 452 **The narrowband spectral slope as a unique marker of task performance**

453           When relating the spectral slope and neural complexity to behavioral outcomes, we observed  
454 that only the narrowband slope within 30 – 45Hz was correlated with attentional task performance in an  
455 auditory Go/Nogo task across all recordings per subject. Thus, it appears that the narrowband slope  
456 serves as a particularly sensitive marker for task-dependent fluctuations in brain states associated with  
457 behavioral performance. This association between adaptively flatter slopes and better task performance  
458 might even translate to more general cognitive tasks that do not solely rely on attention since we also  
459 observed a consistent positive but weaker relationship with memory performance. In larger scale studies  
460 that rely on databases or in multicenter studies, which commonly have higher statistical power, however,  
461 the broadband slope and complexity were also significantly correlated with task performance. For  
462 instance, Mediano et al. (2021) and Waschke et al. (2021) found an association between task-specific  
463 attention levels and spectral slope or neural complexity in a broader frequency range. As in our study  
464 the correlation between the broadband slope and complexity with the Go/Nogo task performance was  
465 also consistently positive but too weak to reach statistical significance, these findings do not necessarily  
466 contradict our claim that the narrowband spectral slope is even more sensitive to adaptive task-  
467 dependent changes in brain state. In contrast, this shows that lower statistical power might suffice for  
468 the narrowband slope to index robust relationships with behavioral performance.

## 469 **Limitations**

470           It should be noted that the cognitive tasks were not specifically designed for the analyses of  
471 varying levels of task demand as the data presented here was obtained from a study that was originally  
472 designed for the investigation of short-wavelength light effects on sleep, attention and memory  
473 performance (cf., Höhn et al., 2021 and Schmid et al., 2021). In the future, it might be promising to  
474 contrast tasks that exclusively rely on different cognitive resources and sensory modalities (e.g., auditory  
475 vs. visual) to assess how spectral slope and neural complexity adapt topographically to different  
476 modalities. Even though we used only 11 scalp electrodes, we still robustly detected the effects of sleep  
477 stage and task demand, providing evidence for the power of the spectral slope and neural complexity  
478 as indices of different brain states. Nevertheless, research with high-density or intracranial EEG setups  
479 might further contribute to the understanding of which topographical areas are most influential in driving  
480 changes in slope or complexity across brain states. Finally, we only recruited healthy male adults in a  
481 restricted age range (18 – 25 years) in order to avoid potential sex differences and hormonal effects  
482 (Kozhemiako et al., 2021; Plamberger et al., 2021). Therefore, it is unclear to what extent our results  
483 generalize to other populations. While sex does not necessarily affect the spectral slope or neural  
484 complexity when controlling for overall signal amplitude (Bódizs et al., 2021; Tosun et al., 2019), age  
485 does seem to play an important role in terms of developmental changes in the spectral slope and  
486 decorrelation of brain activity, which begins during early childhood (Chini et al., 2022; Schaworonkow &  
487 Voytek, 2021) and lasts until late adulthood (Dave et al., 2018). While this task-independent flattening  
488 of the slope in older subjects has been associated with decline in cognitive functioning (Voytek et al.,  
489 2015), our results suggest that task-dependent increases in excitation (expressed by flatter slopes)  
490 might be beneficial for behavioral performance. Thus, an adaptive task-specific modulation of the slope  
491 in healthy individuals appears to be associated with better task performance and might index cognitive  
492 adaptability.

## 493 Conclusion

494 Taken together, our results demonstrate that the EEG spectral slope and neural complexity are  
 495 powerful indices of different brain states during sleep and wakefulness. We provide robust evidence  
 496 from multiple recordings of three within-subjects measurements, showing that sleep stages and task  
 497 demands are reliably indexed by both, the spectral slope and neural complexity. Critically, we show that  
 498 the selected frequency range has a strong impact on the interpretability and functional relevance of the  
 499 two parameters. When trying to distinguish different brain states, the broadband spectral slope and  
 500 neural complexity are more sensitive, however, only the narrowband spectral slope within 30 – 45Hz  
 501 turned out to be a powerful index of behavioral performance and best suited to differentiate REM sleep  
 502 from wakefulness and all other sleep stages.

## 503 Materials and methods

### Key resources table

| Reagent type<br>(species) or resource | Designation                  | Source or<br>reference     | Identifiers         | Additional<br>information                                                                                                                                     |
|---------------------------------------|------------------------------|----------------------------|---------------------|---------------------------------------------------------------------------------------------------------------------------------------------------------------|
| Software,<br>algorithm                | Brain Vision<br>Analyzer 2.2 | Brain Products<br>GmbH     | RRID:<br>SCR_002356 | <a href="https://www.brainproduct.com">https://www.brainproduct.com</a>                                                                                       |
| Software,<br>algorithm                | Adobe<br>Illustrator CS6     | Adobe Inc.                 | RRID:<br>SCR_010279 |                                                                                                                                                               |
| Software,<br>algorithm                | Fieldtrip<br>(obob_ownft)    | Oostenveld et<br>al., 2011 | RRID:<br>SCR_004849 | <a href="https://gitlab.com/obob/obob_ownft/">https://gitlab.com/obob/obob_ownft/</a>                                                                         |
| Software,<br>algorithm                | FOOOF<br>(specparam)         | Donoghue et<br>al., 2020   |                     | <a href="https://fooof-tools.github.io/fooof/">https://fooof-tools.github.io/fooof/</a>                                                                       |
| Software,<br>algorithm                | ggplot-2                     | Wickham,<br>2016           | RRID:<br>SCR_014601 | <a href="https://cran.r-project.org/web/packages/ggplot2/index.html">https://cran.r-project.org/web/packages/ggplot2/index.html</a>                           |
| Software,<br>algorithm                | Lempel-Ziv<br>complexity     | Comsa, 2019                |                     | <a href="https://github.com/iuliam-comsa/EEG/tree/master/Lempel-Ziv%20complexity">https://github.com/iuliam-comsa/EEG/tree/master/Lempel-Ziv%20complexity</a> |
| Software,<br>algorithm                | MANOVA.RM                    | Friedrich et<br>al., 2019  |                     | <a href="https://cran.r-project.org/web/packages/MANOVA.RM/index.html">https://cran.r-project.org/web/packages/MANOVA.RM/index.html</a>                       |
| Software,<br>algorithm                | MATLAB<br>2018b              | MathWorks<br>Inc.          | RRID:<br>SCR_001622 |                                                                                                                                                               |
| Software,<br>algorithm                | MVPA-light<br>toolbox        | Treder, 2020               | RRID:<br>SCR_022173 | <a href="https://github.com/treder/MVPA-Light">https://github.com/treder/MVPA-Light</a>                                                                       |

|                        |                       |                             |                     |                                                                   |
|------------------------|-----------------------|-----------------------------|---------------------|-------------------------------------------------------------------|
| Software,<br>algorithm | Psychtoolbox<br>PTB-3 | Kleiner et al.,<br>2007     | RRID:<br>SCR_002881 | <a href="http://psychtoolbox.org/">http://psychtoolbox.org/</a>   |
| Software,<br>algorithm | RStudio<br>2021.09    | RStudio Team                | RRID:<br>SCR_000432 |                                                                   |
| Software,<br>algorithm | Somnolyzer<br>24 x 7  | Koninklijke<br>Philips N.V. |                     | <a href="https://www.philips.co.in">https://www.philips.co.in</a> |

504

## 505 **Participants and inclusion criteria**

506 We recorded data from 28 male participants (18 – 25 years; mean age  $21.54 \pm 1.90$  years).  
507 Final sample sizes varied for each analysis between  $N = 26 - 28$  as some participants had missing data  
508 for specific tasks or timepoints (the exact sample size for each analysis is provided in the corresponding  
509 figure captions). All participants were free of medication and did not suffer from a mental or physiological  
510 illness or from sleep problems. They adhered to a regular sleep-wake rhythm (i.e., regular bedtimes with  
511 about 8 hours of sleep per night) and refrained from drug abuse and above-average caffeine  
512 consumption (more than three cups of coffee per day) during participation. For screening purposes, all  
513 subjects filled in an entrance questionnaire in which we checked for sleep quality, mood, anxiety,  
514 perceived stress level and chronotype (see Supplementary file – Table 1). Written informed consent was  
515 obtained from every participant and all subjects were remunerated with either 100€ and 16 hours course  
516 credit or 50€ and 24 hours course credit. The study was approved by the local ethics committee of the  
517 University of Salzburg (EK-GZ: 16/2014) and conducted in agreement with the Declaration of Helsinki.

## 518 **Experimental protocol**

### 519 *Study design*

520 Each subject participated over a time span of 14 days, with an entrance examination marking  
521 day one (an outline of the study protocol is presented in Figure 1). From that day on, participants wore  
522 an actigraph (MotionWatch 8; CamNtech Ltd, Cambridge, England) and filled in daily online sleep  
523 protocols (LimeSurvey GmbH, Hamburg, Germany), which we used to check for compliance with a  
524 regular sleep-wake rhythm.

525 The first recording was scheduled on day four and was implemented only for adaptation  
526 purposes in order to avoid potential first night effects (Browman & Cartwright, 1980; Curcio et al., 2004).  
527 After placement of all EEG, ECG, EMG and EOG electrodes, the participants were familiarized with the  
528 resting and Go/Nogo tasks. Bedtime was scheduled for approximately 11:00 pm and the participants  
529 were woken up 8 hours after lights out before they left the laboratory at approximately 9:00 am.

530 The experimental recordings were scheduled on days 7, 10 and 13. Participants arrived at 6:00 pm and  
531 EEG, ECG, EMG and EOG electrodes were mounted. The recordings started with an initial resting  
532 session (3min eyes closed and 3min eyes open) and the Go/Nogo task (10min), which was followed by  
533 the encoding sessions (two times 14min) of a declarative memory task. Before the first cued recall,  
534 another resting and Go/Nogo session were conducted. Afterwards, the participants had a 1.5 hours  
535 break from the tasks, in which they read stories under different light conditions (for details cf., Schmid  
536 et al., 2021). Before going to bed at approximately 11:00 pm, participants completed the last resting and

537 Go/Nogo session of the day. After awakening, a morning session of resting and the Go/Nogo task as  
538 well as another recall from the declarative memory task were performed. During all wake-recordings,  
539 daylight mimicking room lights (provided by Emilum GmbH, Oberalm, Austria) were dimmed to 4.5  
540 photopic lux and room temperature was adjusted via air conditioning based on participant's preferences.

#### 541 *Go/Nogo task*

542 To assess objective levels of attention, we implemented an auditory version of the Go/Nogo  
543 paradigm (Donders, 1969) via the Psychophysics Toolbox (PTB-3; Kleiner et al., 2007) in MATLAB  
544 (Release 2018b, The MathWorks Inc., Natick, MA). Participants were asked to react as quickly as  
545 possible with a button press on a response time box (RTBox v5/6; Ohio State University, Columbus,  
546 OH) whenever they heard a 'Go' sound and needed to inhibit their reaction when a 'Nogo' sound was  
547 played. The task comprised 400 trials with Go sounds being presented in 80% of the trials and Nogo  
548 sounds occurring in the remaining 20% of trials (the order of Go and Nogo sounds was randomized  
549 each time). The two stimuli used for the Go and Nogo sounds were low- (1000Hz) and high-pitched  
550 (1500Hz) tones, which were presented for 50ms with a varying interstimulus interval (1480 – 1880ms).  
551 Whether the low- or high-pitched sound represented the Go-signal was determined by chance at the  
552 beginning of each session. Participants had to react within 500ms for the response to be considered  
553 valid, but responses were recorded until 1000ms post-stimulus with reaction times longer than 500ms  
554 being regarded as attentional lapses. From each session, the performance score was computed by  
555 dividing the percentage of correct trials by the median reaction time of all valid responses ( $\leq 500$ ms, no  
556 errors) in milliseconds (Figueiro et al., 2016; Höhn et al., 2021).

#### 557 *Declarative memory task*

558 Participants encoded a set of 80 word pairs on days 7, 10 and 13. To avoid learning effects over  
559 time, a different but similarly difficult set of 80 word pairs was presented on each of the three days. The  
560 order of the sets was randomized across subjects. Each set was presented twice for 14min during  
561 encoding and the data from both encoding sessions was pooled for further analyses. Each word pair  
562 was presented for 1500ms and was followed by a fixation-cross for 8500ms. Participants were instructed  
563 to encode the word pair as vividly as possible during the presentation of the fixation-cross by imagining  
564 a semantic connection between the two words. During the cued recall sessions, only the first word of a  
565 pair was presented, and participants were asked to press a button on the response time box as soon as  
566 they remembered the second word. Whenever a button was pressed, the participant was instructed to  
567 name the missing word and a fixation-cross appeared for 3500ms while the experimenter noted the  
568 answer. When no button was pressed, the fixation-cross appeared automatically after 6500ms.

#### 569 **EEG recording and analyses**

570 All electrophysiological data were recorded with a sampling rate of 500Hz via the BrainVision  
571 Recorder software (Version 2.11, Brain Products GmbH, 2015) using a 32 channel BrainAmp system  
572 (Brain Products GmbH, Munich, Germany). We placed 11 gold-cup electrodes (Grass Technologies,  
573 Astro-Med GmbH, Rodgau, Germany) according to the international 10-20 system on the positions: F3,  
574 Fz, F4, C3, Cz, C4, P3, Pz, P4, O1 and O2. The average of positions A1 and A2 on the left and right

575 mastoids was used for offline re-referencing as the data were online referenced against Cz. Fpz was  
576 used as ground electrode. Additionally, two EMG electrodes were placed on the musculus mentalis for  
577 measuring muscle activity during sleep and four EOG electrodes around the eyes to record horizontal  
578 and vertical eye movements. ECG was recorded with an electrode on the right clavicular and another  
579 one on the lowest left costal arch. Impedances were always kept below 10k $\Omega$ .

### 580 *Polysomnography*

581 The time in bed was standardized for all polysomnography recordings and comprised exactly 8  
582 hours. For sleep staging, the data were first low-pass filtered at 30Hz and re-referenced to contralateral  
583 mastoids with the BrainVision Analyzer software (Version 2.2.0.7383, Brain Products GmbH, 2019).  
584 Physio-channels were referenced in a bipolar manner and the data were down-sampled to 128Hz before  
585 sleep stages were classified for each 30 second epoch with the Somnolyzer 24 x 7 algorithm (Koninklijke  
586 Philips N.V.; Eindhoven, The Netherlands) in accordance with the criteria of the American Academy of  
587 Sleep Medicine (Richard et al., 2012). The results were finally verified by a human expert scorer. The  
588 general sleep architecture of each night is presented descriptively in Supplementary file – Table 5.

### 589 *EEG preprocessing*

590 In a first step, the data were processed with the BrainVision Analyzer software, and we applied  
591 a 0.3Hz high-pass as well as a 50Hz notch filter. The EEG channels were re-referenced to linked  
592 mastoids and the online reference Cz was restored. We corrected for eye movements with the Gratton  
593 & Coles method (Gratton et al., 1983; only implemented for data during wakefulness) and ran an  
594 automatic artifact detection. The data were then down-sampled to 250Hz and exported for further  
595 analyses in MATLAB. The continuous data were de-trended and subsequently segmented into epochs  
596 of 4s for each task and sleep stage using the fieldtrip toolbox (Oostenveld et al., 2011). To be able to  
597 compare all task- and sleep-data, we decided to set the epoch-length to 4s as this enabled the best  
598 tradeoff between a sufficient number of epochs even for the shortest tasks (3min resting sessions) and  
599 an adequate frequency resolution within 0.5 – 45Hz. All artifact-containing epochs (defined as > 1%  
600 being detected as artifact) were removed for the following analyses. Since the remaining number of  
601 clean epochs from the different tasks (resting, Go/Nogo, encoding and retrieval) and sleep-stages  
602 (WAKE, N1, N2, N3 and REM) varied dramatically due to different recording lengths, we balanced the  
603 number of epochs across tasks and sleep-stages for the multivariate pattern analyses (MVPA) to ensure  
604 the validity of the classification results. In more detail, we set the maximum number of epochs for the  
605 MVPA analyses to the highest possible number of epochs from the shortest task (i.e., 45 epochs as the  
606 resting sessions only comprised 3min). To do so, we drew a random subset of 45 epochs from all data  
607 that contained more than 45 clean epochs. For all other analyses we used all available data to maximize  
608 the signal to noise ratio wherever possible (for the number of epochs used per task and sleep stage see  
609 Supplementary file – Table 6).

### 610 *Spectral Slope*

611 To obtain the spectral slope, we first calculated power-spectra between 0.5 – 45Hz from the  
612 preprocessed, 4s segmented data via the *mtmfft* method in Fieldtrip (Oostenveld et al., 2011) using a

613 multi-taper approach (1Hz frequency smoothing; Lendner et al., 2020). To extract the spectral slope  
614 information, we applied robust linear fits (using the *robust fit* MATLAB function) in log-log space between  
615 30 – 45Hz based on a previously established method (Lendner et al., 2020). We decided to use robust  
616 linear fits instead of using the *FOOOF* algorithm (alternatively known as *specparam*; Donoghue et al.,  
617 2020) for the narrowband frequency range since this approach has already been established to yield a  
618 sensitive aperiodic marker of arousal by Lendner et al. (2020) and because in this frequency range also  
619 the *FOOOF* would approximate a linear fit, thus leading to highly comparable results. However, for the  
620 broadband frequency range (3 – 45Hz), we applied the *FOOOF* algorithm to extract the slope as the  
621 linear fits would have been skewed by oscillatory bumps in the power spectrum.

## 622 *Neural Complexity*

623 We followed previous approaches (Mediano et al., 2021; Schartner et al., 2015) and calculated  
624 the Lempel-Ziv-Welch complexity (Lempel & Ziv, 1976; Welch, 1984) as a proxy for neural complexity  
625 per channel and epoch. To obtain the neural complexity in the same frequency ranges in which we  
626 calculated the spectral slope, we applied additional 3 or 30Hz high-pass and 45Hz low-pass filters to  
627 ensure that the underlying signal contained the same frequencies as for the spectral slope. As Rivolta  
628 et al. (2014) demonstrated that 1000 datapoints are sufficient for reliable Lempel-Ziv complexity  
629 analyses during sleep, we used the same 4s segmented data (which translates to 1000 sampling points  
630 per epoch in the down sampled data) for the neural complexity analyses that we used for the spectral  
631 slope. We then applied a Hilbert-transformation on each epoch to obtain the instantaneous amplitude.  
632 Afterwards, we binarized the resulting single epoch data around its median amplitude and transformed  
633 it into a binary sequence. Values of 1 were given for amplitude samples above the median and values  
634 of 0 for amplitudes below (or equal with) the median. This binary sequence of ones and zeros was finally  
635 subjected to the Lempel-Ziv-Welch complexity algorithm (Comsa, 2019) in MATLAB. To make sure that  
636 our results were not affected by different algorithm implementations, we additionally ran the original  
637 Lempel-Ziv algorithm (LZ76, implemented in MATLAB by Thai, 2012) but did not obtain any different  
638 results. Thus, only the results from the Comsa (2019) algorithm are reported.

## 639 **Statistical analyses**

640 Statistics were calculated in R-Studio (Version 4.1.2.; RStudio Team, 2021). MATLAB functions  
641 from the Fieldtrip toolbox and the ggplot-framework (Wickham, 2016) in R were adapted for data  
642 visualization.

## 643 *Factorial analyses and correlations*

644 All analyses involved three repeated measurements (on days 7, 10 and 13; cf., Figure 1) and  
645 therefore at least two factors (lab-session and task or sleep stage). Since in most cases at least one  
646 assumption for parametrical testing was violated, we decided to compute more conservative semi-  
647 parametrical analyses with the MANOVA.RM package (Friedrich et al., 2019). For these factorial  
648 analyses, data were averaged over all EEG electrodes to facilitate interpretation of the results. In the  
649 statistical results, we always refer to the Wald-Type-Statistics (WTS) with empirical p-values obtained

650 from permutation resampling procedures and 10.000 iterations. Whenever multiple comparisons were  
651 conducted for follow-up testing, p-values were corrected for alpha error inflation with the Benjamini-  
652 Hochberg procedure (Benjamini & Hochberg, 1995).

653 For correlation analyses, we computed Spearman rho coefficients instead of Pearson  
654 correlations whenever the normality assumption was significantly violated (indicated by Shapiro-Wilk  
655 tests) and in general for all cluster correlations on the whole scalp level. For the cluster corrected  
656 correlation approach, we used the Monte-Carlo method with 10.000 iterations to assess the relationship  
657 between the EEG parameters per channel and the behavioral measures.

### 658 *Multivariate pattern analyses (MVPA)*

659 Since it is difficult to take topographical patterns into account in classical factorial designs, we  
660 additionally computed multivariate pattern analyses using the MVPA-Light toolbox (Treder, 2020) in  
661 MATLAB to further exploit the information present in the complexity and slope data as patterns across  
662 electrodes. For each task and sleep stage, the complexity and slope from every epoch and electrode  
663 was fed into the classifier. Thus, the single epochs per subject were used for training and testing while  
664 the complexity and slope patterns over electrodes represented the multivariate information. For  
665 comparisons between more than two tasks or sleep stages, multiclass linear-discriminant analyses  
666 (LDA) were used and regular LDA for two-condition comparisons. We calculated classifier accuracies  
667 per subject via leave-one-out cross validation (LOO-CV) to account for the restricted amount of data  
668 available for training and testing in our sample. Since no effects regarding the different lab-sessions  
669 emerged, we pooled the data from the different lab-sessions for each subject in order to improve the  
670 reliability of the MVPA analyses.

### 671 **Acknowledgements**

672 This research was funded by the Austrian Science Fund (FWF, P32028) and the Centre for  
673 Cognitive Neuroscience Salzburg (CCNS). C.H. further received funding from the Doctoral College  
674 "Imaging the Mind" (FWF; W1233-B). J.D.L. received a grant from the German Research Foundation  
675 (DFG LE 3863/2-1). We would like to thank all volunteering participants for their time and effort. Further,  
676 we are very grateful for the support from Sarah R. Schmid, Selina Schindlmayr, Daniela Niebler, Lucy  
677 Matthews, Marina Thierauf, Leoni Bernstorf, Lorenz Rapp, Henrik Rheinwald and Leonard van Dyck  
678 regarding the data collection process and recruitment of participants.

### 679 **Additional Information**

#### 680 **Competing interests**

681 The authors do not declare any competing interests.

#### 682 **Funding**

| <u>Funder</u>               | <u>Grant reference number</u> | <u>Author</u>    |
|-----------------------------|-------------------------------|------------------|
| Austrian Science Fund (FWF) | W 1233-G17                    | Christopher Höhn |



|                                                                                                                      |                            |                                      |
|----------------------------------------------------------------------------------------------------------------------|----------------------------|--------------------------------------|
| German Research Foundation<br>(DFG)                                                                                  | LE 3863/2-1<br>HE 8329/2-1 | Janna D. Lendner,<br>Michael A. Hahn |
| Austrian Science Fund (FWF)                                                                                          | P 32028                    | Kerstin Hoedlmoser                   |
| Jung Foundation for Science<br>and Research: Ernst Jung<br>Career Advancement Award,<br>awarded to Randolph Helfrich |                            | Janna D. Lendner,<br>Michael A. Hahn |
| Centre for Cognitive<br>Neuroscience Salzburg                                                                        |                            | Kerstin Hoedlmoser                   |

## 683 Ethics

684 This study was conducted in accordance with the guidelines from the Declaration of Helsinki.  
685 Written approval was additionally provided by the local ethics committee of the University of Salzburg  
686 (EK-GZ: 16/2014).

## 687 References

- 688 Aamodt, A., Nilsen, A. S., Thüerer, B., Moghadam, F. H., Kauppi, N., Juel, B. E., & Storm, J. F. (2021).  
689 Eeg Signal Diversity Varies With Sleep Stage and Aspects of Dream Experience. *Frontiers in*  
690 *Psychology*, 12, 655884. <https://doi.org/10.3389/fpsyg.2021.655884>
- 691 Aarabi, A., & He, B. (2012). A rule-based seizure prediction method for focal neocortical epilepsy.  
692 *Clinical Neurophysiology*, 123(6), 1111–1122. <https://doi.org/10.1016/j.clinph.2012.01.014>
- 693 Abásolo, D., Simons, S., Da Morgado Silva, R., Tononi, G., & Vyazovskiy, V. V. (2015). Lempel-Ziv  
694 complexity of cortical activity during sleep and waking in rats. *Journal of Neurophysiology*,  
695 113(7), 2742–2752. <https://doi.org/10.1152/jn.00575.2014>
- 696 Ackerman, S. (1992). *Discovering the Brain*. National Academies Press.  
697 <http://gbv.ebib.com/patron/FullRecord.aspx?p=3376517>
- 698 Aime, M., Calcini, N., Borsa, M., Campelo, T., Rusterholz, T., Sattin, A., Fellin, T., & Adamantidis, A.  
699 (2022). Paradoxical somatodendritic decoupling supports cortical plasticity during REM sleep.  
700 *Science*, 376(6594), 724–730. <https://doi.org/10.1126/science.abk2734>
- 701 Ameen, M. S., Cheung, L. M., Hauser, T., Hahn, M. A [Michael A.], & Schabus, M. (2019). About the  
702 Accuracy and Problems of Consumer Devices in the Assessment of Sleep. *Sensors (Basel,*  
703 *Switzerland)*, 19(19). <https://doi.org/10.3390/s19194160>
- 704 Andrillon, T., Poulsen, A. T., Hansen, L. K., Léger, D., & Kouider, S. (2016). Neural Markers of  
705 Responsiveness to the Environment in Human Sleep. *The Journal of Neuroscience*, 36(24),  
706 6583–6596. <https://doi.org/10.1523/JNEUROSCI.0902-16.2016>
- 707 Benjamini, Y., & Hochberg, Y. (1995). Controlling the False Discovery Rate: A Practical and Powerful  
708 Approach to Multiple Testing. *Journal of the Royal Statistical Society: Series B (Methodological)*,  
709 57(1), 289–300. <https://doi.org/10.1111/j.2517-6161.1995.tb02031.x>
- 710 Blumberg, M. S., Lesku, J. A., Libourel, P.-A., Schmidt, M. H., & Rattenborg, N. C. (2020). What Is REM  
711 Sleep? *Current Biology : CB*, 30(1), R38-R49. <https://doi.org/10.1016/j.cub.2019.11.045>
- 712 Bódizs, R., Szalárdy, O., Horváth, C., Ujma, P. P., Gombos, F., Simor, P., Pótári, A., Zeising, M.,  
713 Steiger, A., & Dresler, M. (2021). A set of composite, non-redundant EEG measures of NREM  
714 sleep based on the power law scaling of the Fourier spectrum. *Scientific Reports*, 11(1), 2041.  
715 <https://doi.org/10.1038/s41598-021-81230-7>
- 716 Boe, A. J., McGee Koch, L. L., O'Brien, M. K., Shawen, N., Rogers, J. A., Lieber, R. L., Reid, K. J.,  
717 Zee, P. C., & Jayaraman, A. (2019). Automating sleep stage classification using wireless,  
718 wearable sensors. *NPJ Digital Medicine*, 2, 131. <https://doi.org/10.1038/s41746-019-0210-1>
- 719 Browman, C. P., & Cartwright, R. D. (1980). The first-night effect on sleep and dreams. *Biological*  
720 *Psychiatry*, 15(5), 809–812.

- 721 Chini, M., Pfeffer, T., & Hanganu-Opatz, I. (2022). An increase of inhibition drives the developmental  
722 decorrelation of neural activity. *ELife*, 11. <https://doi.org/10.7554/eLife.78811>
- 723 Colombo, M. A., Napolitani, M., Boly, M., Gosseries, O., Casarotto, S., Rosanova, M., Brichant, J.-F.,  
724 Boveroux, P., Rex, S., Laureys, S [Steven], Massimini, M., Chieragato, A., & Sarasso, S.  
725 (2019). The spectral exponent of the resting EEG indexes the presence of consciousness during  
726 unresponsiveness induced by propofol, xenon, and ketamine. *NeuroImage*, 189, 631–644.  
727 <https://doi.org/10.1016/j.neuroimage.2019.01.024>
- 728 Comsa, I.-M. (2019). *Tracking brain dynamics across transitions of consciousness* [Doctoral thesis].  
729 University of Cambridge, Cambridge, England. <https://doi.org/10.17863/CAM.37723>
- 730 Curcio, G., Ferrara, M., Piergianni, A., Fratello, F., & Gennaro, L. de (2004). Paradoxes of the first-night  
731 effect: A quantitative analysis of antero-posterior EEG topography. *Clinical Neurophysiology*,  
732 115(5), 1178–1188. <https://doi.org/10.1016/j.clinph.2003.12.018>
- 733 Dave, S., Brothers, T. A., & Swaab, T. Y. (2018). 1/f neural noise and electrophysiological indices of  
734 contextual prediction in aging. *Brain Research*, 1691, 34–43.  
735 <https://doi.org/10.1016/j.brainres.2018.04.007>
- 736 Davis, H., Davis, P. A., Loomis, A. L., Harvey, E. N., & Hobart, G. (1938). Human brain potentials during  
737 the onset of sleep. *Journal of Neurophysiology*, 1(1), 24–38.
- 738 Dijk, D.-J. (1995). EEG slow waves and sleep spindles: windows on the sleeping brain. *Behavioural*  
739 *Brain Research*, 69(1-2), 109–116. [https://doi.org/10.1016/0166-4328\(95\)00007-G](https://doi.org/10.1016/0166-4328(95)00007-G)
- 740 Donders, F. C. (1969). On the speed of mental processes. *Acta Psychologica*, 30, 412–431.  
741 [https://doi.org/10.1016/0001-6918\(69\)90065-1](https://doi.org/10.1016/0001-6918(69)90065-1)
- 742 Donoghue, T., Haller, M., Peterson, E. J., Varma, P., Sebastian, P., Gao, R., Noto, T., Lara, A. H.,  
743 Wallis, J. D., Knight, R. T., Shestyuk, A., & Voytek, B. (2020). Parameterizing neural power  
744 spectra into periodic and aperiodic components. *Nature Neuroscience*, 23(12), 1655–1665.  
745 <https://doi.org/10.1038/s41593-020-00744-x>
- 746 Ferenets, R., Vanluchene, A., Lipping, T., Heyse, B., & Struys, M. M. R. F. (2007). Behavior of  
747 entropy/complexity measures of the electroencephalogram during propofol-induced sedation:  
748 Dose-dependent effects of remifentanyl. *Anesthesiology*, 106(4), 696–706.  
749 <https://doi.org/10.1097/01.anes.0000264790.07231.2d>
- 750 Figueiro, M. G., Sahin, L., Wood, B., & Plitnick, B. (2016). Light at Night and Measures of Alertness and  
751 Performance: Implications for Shift Workers. *Biological Research for Nursing*, 18(1), 90–100.  
752 <https://doi.org/10.1177/1099800415572873>
- 753 Friedrich, S., Konietschke, F., & Pauly, M. (2019). Resampling-Based Analysis of Multivariate Data and  
754 Repeated Measures Designs with the R Package MANOVA.RM. *The R Journal*, 11(2), 380–  
755 400. <https://doi.org/10.32614/RJ-2019-051>
- 756 Gao, R., & Penzes, P. (2015). Common mechanisms of excitatory and inhibitory imbalance in  
757 schizophrenia and autism spectrum disorders. *Current Molecular Medicine*, 15(2), 146–167.  
758 <https://doi.org/10.2174/1566524015666150303003028>
- 759 Gao, R., Peterson, E. J., & Voytek, B. (2017). Inferring synaptic excitation/inhibition balance from field  
760 potentials. *NeuroImage*, 158, 70–78. <https://doi.org/10.1016/j.neuroimage.2017.06.078>
- 761 Gerster, M., Waterstraat, G., Litvak, V., Lehnertz, K., Schnitzler, A., Florin, E., Curio, G., & Nikulin, V.  
762 (2022). Separating Neural Oscillations from Aperiodic 1/f Activity: Challenges and  
763 Recommendations. *Neuroinformatics*. Advance online publication.  
764 <https://doi.org/10.1007/s12021-022-09581-8>
- 765 González, J., Mateos, D., Cavelli, M., Mondino, A., Pascovich, C., Torterolo, P., & Rubido, N. (2022).  
766 Low frequency oscillations drive EEG's complexity changes during wakefulness and sleep.  
767 *Neuroscience*, 494, 1–11. <https://doi.org/10.1016/j.neuroscience.2022.04.025>
- 768 Gratton, G., Coles, M. G., & Donchin, E. (1983). A new method for off-line removal of ocular artifact.  
769 *Electroencephalography and Clinical Neurophysiology*, 55(4), 468–484.  
770 [https://doi.org/10.1016/0013-4694\(83\)90135-9](https://doi.org/10.1016/0013-4694(83)90135-9)
- 771 Halsband, U. (1998). Encoding and retrieval in declarative learning: a positron emission tomography  
772 study. *Behavioural Brain Research*, 97(1-2), 69–78. [https://doi.org/10.1016/S0166-4328\(98\)00028-X](https://doi.org/10.1016/S0166-4328(98)00028-X)
- 774 Harris, K. D., & Thiele, A. (2011). Cortical state and attention. *Nature Reviews. Neuroscience*, 12(9),  
775 509–523. <https://doi.org/10.1038/nrn3084>

- 776 He, B. J. (2011). Scale-free properties of the functional magnetic resonance imaging signal during rest  
777 and task. *The Journal of Neuroscience*, 31(39), 13786–13795.  
778 <https://doi.org/10.1523/JNEUROSCI.2111-11.2011>
- 779 He, B. J. (2014). Scale-free brain activity: Past, present, and future. *Trends in Cognitive Sciences*, 18(9),  
780 480–487. <https://doi.org/10.1016/j.tics.2014.04.003>
- 781 Höhn, C., Schmid, S. R., Plamberger, C. P. [Christina P.], Bothe, K., Angerer, M., Gruber, G.,  
782 Pletzer, B., & Hoedlmoser, K. (2021). Preliminary Results: The Impact of Smartphone Use and  
783 Short-Wavelength Light during the Evening on Circadian Rhythm, Sleep and Alertness. *Clocks  
784 & Sleep*, 3(1), 66–86. <https://doi.org/10.3390/clockssleep3010005>
- 785 Jacob, M. S., Roach, B. J., Sargent, K. S., MATHALON, D. H., & Ford, J. M. (2021). Aperiodic measures  
786 of neural excitability are associated with anticorrelated hemodynamic networks at rest: A  
787 combined EEG-fMRI study. *NeuroImage*, 245, 118705.  
788 <https://doi.org/10.1016/j.neuroimage.2021.118705>
- 789 Kanashiro, T., Ocker, G. K., Cohen, M. R., & Doiron, B. (2017). Attentional modulation of neuronal  
790 variability in circuit models of cortex. *ELife*, 6. <https://doi.org/10.7554/eLife.23978>
- 791 Karalunas, S. L., Ostlund, B. D., Alperin, B. R., Figuracion, M., Gustafsson, H. C., Deming, E. M.,  
792 Foti, D., Antovich, D., Dude, J., Nigg, J., & Sullivan, E. (2022). Electroencephalogram aperiodic  
793 power spectral slope can be reliably measured and predicts ADHD risk in early development.  
794 *Developmental Psychobiology*, 64(3), e22228. <https://doi.org/10.1002/dev.22228>
- 795 Kirstein, C. (2007). Sleeping and Dreaming. In *xPharm: The Comprehensive Pharmacology Reference*  
796 (pp. 1–4). Elsevier. <https://doi.org/10.1016/B978-008055232-3.60319-8>
- 797 Kleiner, M., Brainard, D., Pelli, D., Ingling, A., & Murray, R., Broussard, C. (2007). What's new in  
798 psychtoolbox-3. *Perception*, 36(14), 1–16.
- 799 Klimesch, W. (1999). EEG alpha and theta oscillations reflect cognitive and memory performance: a  
800 review and analysis. *Brain Research Reviews*, 29(2-3), 169–195. [https://doi.org/10.1016/s0165-0173\(98\)00056-3](https://doi.org/10.1016/s0165-0173(98)00056-3)
- 801 Klimesch, W., Schimke, H., & Pfurtscheller, G. (1993). Alpha frequency, cognitive load and memory  
802 performance. *Brain Topography*, 5(3), 241–251. <https://doi.org/10.1007/BF01128991>
- 803 Kozhemiako, N., Mylonas, D., Pan, J. Q., Prerau, M. J., Redline, S., & Purcell, S. M. (2021). Sources of  
804 variation in the spectral slope of the sleep EEG. *BioRxiv*. Advance online publication.  
805 <https://doi.org/10.1101/2021.11.08.467763>
- 806 Kuula, L., & Pesonen, A.-K. (2021). Heart Rate Variability and Firstbeat Method for Detecting Sleep  
807 Stages in Healthy Young Adults: Feasibility Study. *JMIR MHealth and UHealth*, 9(2), e24704.  
808 <https://doi.org/10.2196/24704>
- 809 La Torre-Luque, A. de, Bornas, X., Balle, M., & Fiol-Veny, A. (2016). Complexity and nonlinear  
810 biomarkers in emotional disorders: A meta-analytic study. *Neuroscience and Biobehavioral  
811 Reviews*, 68, 410–422. <https://doi.org/10.1016/j.neubiorev.2016.05.023>
- 812 Lau, Z. J., Pham, T., Chen, S. H. A., & Makowski, D. (2022). Brain entropy, fractal dimensions and  
813 predictability: A review of complexity measures for EEG in healthy and neuropsychiatric  
814 populations. *The European Journal of Neuroscience*. Advance online publication.  
815 <https://doi.org/10.1111/ejn.15800>
- 816 Lempel, A., & Ziv, J. (1976). On the Complexity of Finite Sequences. *IEEE Transactions on Information  
817 Theory*, 22(1), 75–81. <https://doi.org/10.1109/TIT.1976.1055501>
- 818 Lendner, J. D., Helfrich, R. F., Mander, B. A., Romundstad, L., Lin, J. J., Walker, M. P., Larsson, P. G.,  
819 & Knight, R. T. (2020). An electrophysiological marker of arousal level in humans. *ELife*, 9.  
820 <https://doi.org/10.7554/eLife.55092>
- 821 Lendner, J. D., Mander, B. A., Schuh-Hofer, S., Schmidt, H., Knight, R. T., Walker, M. P., Lin, J., &  
822 Helfrich, R. F. (2022). Human REM sleep controls neural excitability in support of memory  
823 formation. *BioRxiv*. Advance online publication. <https://doi.org/10.1101/2022.05.13.491801>
- 824 Lüdtke, S., Hermann, W., Kirste, T., Beneš, H., & Teipel, S. (2021). An algorithm for actigraphy-based  
825 sleep/wake scoring: Comparison with polysomnography. *Clinical Neurophysiology*, 132(1),  
826 137–145. <https://doi.org/10.1016/j.clinph.2020.10.019>
- 827 Ma, Y., Shi, W., Peng, C.-K., & Yang, A. C. (2018). Nonlinear dynamical analysis of sleep  
828 electroencephalography using fractal and entropy approaches. *Sleep Medicine Reviews*, 37,  
829 85–93. <https://doi.org/10.1016/j.smrv.2017.01.003>
- 830

- 831 Mateos, D., Guevara Erra, R., Wennberg, R., & Perez Velazquez, J. L. (2018). Measures of entropy and  
832 complexity in altered states of consciousness. *Cognitive Neurodynamics*, 12(1), 73–84.  
833 <https://doi.org/10.1007/s11571-017-9459-8>
- 834 Medel, V., Irani, M., Ossandón, T., & Boncompte, G. (2020). Complexity and 1/f slope jointly reflect  
835 cortical states across different E/I balances. *BioRxiv*. Advance online publication.  
836 <https://doi.org/10.1101/2020.09.15.298497>
- 837 Mediano, P. A. M., Ikkala, A., Kievit, R. A., Jagannathan, S. R., Varley, T. F., Stamatakis, E. A.,  
838 Bekinschtein, T. A., & Bor, D. (2021). Fluctuations in Neural Complexity During Wakefulness  
839 Relate To Conscious Level and Cognition. *BioRxiv*. Advance online publication.  
840 <https://doi.org/10.1101/2021.09.23.461002>
- 841 Mediano, P. A. M., Rosas, F. E., Timmermann, C., Roseman, L., Nutt, D. J., Feilding, A., Kaelen, M.,  
842 Kringelbach, M. L., Barrett, A. B., Seth, A., Muthukumaraswamy, S. D., Bor, D., & Carhart-  
843 Harris, R. L. (2020). Effects of external stimulation on psychedelic state neurodynamics.  
844 *BioRxiv*. Advance online publication. <https://doi.org/10.1101/2020.11.01.356071>
- 845 Miskovic, V., MacDonald, K. J., Rhodes, L. J., & Cote, K. A. (2019). Changes in EEG multiscale entropy  
846 and power-law frequency scaling during the human sleep cycle. *Human Brain Mapping*, 40(2),  
847 538–551. <https://doi.org/10.1002/hbm.24393>
- 848 Mitsukura, Y., Fukunaga, K., Yasui, M., & Mimura, M. (2020). Sleep stage detection using only heart  
849 rate. *Health Informatics Journal*, 26(1), 376–387. <https://doi.org/10.1177/1460458219827349>
- 850 Oostenveld, R., Fries, P., Maris, E., & Schoffelen, J.-M. (2011). Fieldtrip: Open source software for  
851 advanced analysis of MEG, EEG, and invasive electrophysiological data. *Computational*  
852 *Intelligence and Neuroscience*, 2011, 156869. <https://doi.org/10.1155/2011/156869>
- 853 Ouyang, G., Hildebrandt, A., Schmitz, F., & Herrmann, C. S. (2020). Decomposing alpha and 1/f brain  
854 activities reveals their differential associations with cognitive processing speed. *NeuroImage*,  
855 205, 116304. <https://doi.org/10.1016/j.neuroimage.2019.116304>
- 856 Pascovich, C., Castro-Zaballa, S., Mediano, P. A. M., Bor, D., Canales-Johnson, A., Tortorolo, P., &  
857 Bekinschtein, T. A. (2022). Ketamine and sleep modulate neural complexity dynamics in cats.  
858 *The European Journal of Neuroscience*, 55(6), 1584–1600. <https://doi.org/10.1111/ejn.15646>
- 859 Pathania, A., Euler, M. J., Clark, M., Cowan, R. L., Duff, K., & Lohse, K. R. (2022). Resting EEG  
860 spectral slopes are associated with age-related differences in information processing speed.  
861 *Biological Psychology*, 168, 108261. <https://doi.org/10.1016/j.biopsycho.2022.108261>
- 862 Peever, J., & Fuller, P. M. (2017). The Biology of REM Sleep. *Current Biology : CB*, 27(22), R1237-  
863 R1248. <https://doi.org/10.1016/j.cub.2017.10.026>
- 864 Peigneux, P., Laureys, S [S.], Fuchs, S., Delbeuck, X., Degueldre, C., Aerts, J., Delfiore, G., Luxen, A.,  
865 & Maquet, P. (2001). Generation of rapid eye movements during paradoxical sleep in humans.  
866 *NeuroImage*, 14(3), 701–708. <https://doi.org/10.1006/nimg.2001.0874>
- 867 Pereda, E., Gamundi, A., Rial, R., & González, J. (1998). Non-linear behaviour of human EEG: fractal  
868 exponent versus correlation dimension in awake and sleep stages. *Neuroscience Letters*,  
869 250(2), 91–94. [https://doi.org/10.1016/S0304-3940\(98\)00435-2](https://doi.org/10.1016/S0304-3940(98)00435-2)
- 870 Plamberger, C. P [Christina Paula], van Wijk, H. E., Kerschbaum, H., Pletzer, B. A., Gruber, G.,  
871 Oberascher, K., Dresler, M., Hahn, M. A [Michael Andreas], & Hoedlmoser, K. (2021). Impact  
872 of menstrual cycle phase and oral contraceptives on sleep and overnight memory consolidation.  
873 *Journal of Sleep Research*, 30(4), e13239. <https://doi.org/10.1111/jsr.13239>
- 874 Podvalny, E., Noy, N., Harel, M., Bickel, S., Chechik, G., Schroeder, C. E., Mehta, A. D., Tsodyks, M.,  
875 & Malach, R. (2015). A unifying principle underlying the extracellular field potential spectral  
876 responses in the human cortex. *Journal of Neurophysiology*, 114(1), 505–519.  
877 <https://doi.org/10.1152/jn.00943.2014>
- 878 Radha, M., Fonseca, P., Moreau, A., Ross, M., Cerny, A., Anderer, P., Long, X., & Aarts, R. M. (2019).  
879 Sleep stage classification from heart-rate variability using long short-term memory neural  
880 networks. *Scientific Reports*, 9(1), 14149. <https://doi.org/10.1038/s41598-019-49703-y>
- 881 Richard, B. B., Albertario, C. L., Harding, S. M., Uoyd, R. M., Plante, D. T., Quan, S. F.,  
882 Troester, M. M., & Vaughn, B. V. (2012). *The AASM Manual for the Scoring of Sleep and*  
883 *Associated Events: Rules, Terminology and Technical Specifications* (2<sup>nd</sup> ed.). American  
884 Academy of Sleep Medicine: Darien, IL. [www.aasmnet.org](http://www.aasmnet.org)
- 885 Rivolta, M. W., Migliorini, M., Aktaruzzaman, M., Sassi, R., & Bianchi, A. M. (2014). Effects of the series  
886 length on Lempel-Ziv Complexity during sleep. *Annual International Conference of the IEEE*  
887 *Engineering in Medicine and Biology Society. IEEE Engineering in Medicine and Biology*

- 888            *Society. Annual International Conference, 2014, 693–696.*  
889            <https://doi.org/10.1109/EMBC.2014.6943685>
- 890 Roberts, D. M., Schade, M. M., Mathew, G. M., Gartenberg, D., & Buxton, O. M. (2020). Detecting sleep  
891 using heart rate and motion data from multisensor consumer-grade wearables, relative to wrist  
892 actigraphy and polysomnography. *Sleep, 43*(7). <https://doi.org/10.1093/sleep/zsaa045>
- 893 Robertson, M. M., Furlong, S., Voytek, B., Donoghue, T., Boettiger, C. A., & Sheridan, M. A. (2019).  
894 Eeg power spectral slope differs by ADHD status and stimulant medication exposure in early  
895 childhood. *Journal of Neurophysiology, 122*(6), 2427–2437.  
896 <https://doi.org/10.1152/jn.00388.2019>
- 897 Rubenstein, J. L. R., & Merzenich, M. M. (2003). Model of autism: Increased ratio of excitation/inhibition  
898 in key neural systems. *Genes, Brain, and Behavior, 2*(5), 255–267.  
899 <https://doi.org/10.1034/j.1601-183X.2003.00037.x>
- 900 Sadeh, A., Alster, J., Urbach, D., & Lavie, P. (1989). Actigraphically based automatic bedtime sleep-  
901 wake scoring: Validity and clinical applications. *Journal of Ambulatory Monitoring*(3), 209–216.
- 902 Schartner, M., Pigorini, A., Gibbs, S. A., Arnulfo, G., Sarasso, S., Barnett, L., Nobili, L., Massimini, M.,  
903 Seth, A., & Barrett, A. B. (2017). Global and local complexity of intracranial EEG decreases  
904 during NREM sleep. *Neuroscience of Consciousness, 2017*(1), 1-12.  
905 <https://doi.org/10.1093/nc/niw022>
- 906 Schartner, M., Seth, A., Noirhomme, Q., Boly, M., Bruno, M.-A., Laureys, S [Steven], & Barrett, A. B.  
907 (2015). Complexity of Multi-Dimensional Spontaneous EEG Decreases during Propofol Induced  
908 General Anaesthesia. *PloS One, 10*(8), e0133532.  
909 <https://doi.org/10.1371/journal.pone.0133532>
- 910 Schaworonkow, N., & Voytek, B. (2021). Longitudinal changes in aperiodic and periodic activity in  
911 electrophysiological recordings in the first seven months of life. *Developmental Cognitive*  
912 *Neuroscience, 47*, 100895. <https://doi.org/10.1016/j.dcn.2020.100895>
- 913 Schmid, S. R., Höhn, C., Bothe, K., Plamberger, C. P [Christina P.], Angerer, M., Pletzer, B., &  
914 Hoedlmoser, K. (2021). How Smart Is It to Go to Bed with the Phone? The Impact of Short-  
915 Wavelength Light and Affective States on Sleep and Circadian Rhythms. *Clocks & Sleep, 3*(4),  
916 558–580. <https://doi.org/10.3390/clockssleep3040040>
- 917 Sheehan, T. C., Sreekumar, V., Inati, S. K., & Zaghloul, K. A. (2018). Signal Complexity of Human  
918 Intracranial EEG Tracks Successful Associative-Memory Formation across Individuals. *The*  
919 *Journal of Neuroscience, 38*(7), 1744–1755. [https://doi.org/10.1523/JNEUROSCI.2389-](https://doi.org/10.1523/JNEUROSCI.2389-17.2017)  
920 [17.2017](https://doi.org/10.1523/JNEUROSCI.2389-17.2017)
- 921 Siegel, J. M. (2011). Rem sleep: A biological and psychological paradox. *Sleep Medicine Reviews,*  
922 *15*(3), 139–142. <https://doi.org/10.1016/j.smrv.2011.01.001>
- 923 Symonds, C. (1959). Excitation and inhibition in epilepsy. *Proceedings of the Royal Society of Medicine,*  
924 *52*(6), 395–402.
- 925 Tagliazucchi, E., Wegner, F. von, Morzelewski, A., Brodbeck, V., Jahnke, K., & Laufs, H. (2013).  
926 Breakdown of long-range temporal dependence in default mode and attention networks during  
927 deep sleep. *Proceedings of the National Academy of Sciences of the United States of America,*  
928 *110*(38), 15419–15424. <https://doi.org/10.1073/pnas.1312848110>
- 929 Tal, A., Shinar, Z., Shaki, D., Codish, S., & Goldbart, A. (2017). Validation of Contact-Free Sleep  
930 Monitoring Device with Comparison to Polysomnography. *Journal of Clinical Sleep Medicine,*  
931 *13*(3), 517–522. <https://doi.org/10.5664/jcsm.6514>
- 932 Terzano, M. G., Parrino, L., Smerieri, A., Chervin, R., Chokroverty, S., Guilleminault, C.,  
933 Hirshkowitz, M., Mahowald, M., Moldofsky, H., Rosa, A., Thomas, R., & Walters, A. (2002).  
934 Atlas, rules, and recording techniques for the scoring of cyclic alternating pattern (CAP)  
935 in human sleep. *Sleep Medicine, 3*(2), 187–199. [https://doi.org/10.1016/S1389-9457\(01\)00149-6](https://doi.org/10.1016/S1389-9457(01)00149-6)
- 936 Tosun, P. D., Dijk, D.-J., Winsky-Sommerer, R., & Abásolo, D. (2019). Effects of Ageing and Sex on  
937 Complexity in the Human Sleep EEG: A Comparison of Three Symbolic Dynamic Analysis  
938 Methods. *Complexity, 2019*, 1–12. <https://doi.org/10.1155/2019/9254309>
- 939 Treder, M. S. (2020). Mvpa-Light: A Classification and Regression Toolbox for Multi-Dimensional Data.  
940 *Frontiers in Neuroscience, 14*, 289. <https://doi.org/10.3389/fnins.2020.00289>
- 941 van de Borne, P., Nguyen, H., Biston, P., Linkowski, P., & Degaute, J. P. (1994). Effects of wake and  
942 sleep stages on the 24-h autonomic control of blood pressure and heart rate in recumbent men.  
943 *The American Journal of Physiology, 266*(2), 548-554.  
944 <https://doi.org/10.1152/ajpheart.1994.266.2.H548>

- 945 Voytek, B., & Knight, R. T. (2015). Dynamic network communication as a unifying neural basis for  
946 cognition, development, aging, and disease. *Biological Psychiatry*, 77(12), 1089–1097.  
947 <https://doi.org/10.1016/j.biopsych.2015.04.016>
- 948 Voytek, B., Kramer, M. A., Case, J., Lepage, K. Q., Tempesta, Z. R., Knight, R. T., & Gazzaley, A.  
949 (2015). Age-Related Changes in 1/f Neural Electrophysiological Noise. *The Journal of*  
950 *Neuroscience*, 35(38), 13257–13265. <https://doi.org/10.1523/JNEUROSCI.2332-14.2015>
- 951 Waschke, L., Donoghue, T., Fiedler, L., Smith, S., Garrett, D. D., Voytek, B., & Obleser, J. (2021).  
952 Modality-specific tracking of attention and sensory statistics in the human electrophysiological  
953 spectral exponent. *ELife*, 10. <https://doi.org/10.7554/eLife.70068>
- 954 Waschke, L., Wöstmann, M., & Obleser, J. (2017). States and traits of neural irregularity in the age-  
955 varying human brain. *Scientific Reports*, 7(1), 17381. [https://doi.org/10.1038/s41598-017-](https://doi.org/10.1038/s41598-017-17766-4)  
956 [17766-4](https://doi.org/10.1038/s41598-017-17766-4)
- 957 Welch (1984). A Technique for High-Performance Data Compression. *Computer*, 17(6), 8–19.  
958 <https://doi.org/10.1109/MC.1984.1659158>
- 959 Wickham, H. (2016). *Ggplot2: Elegant graphics for data analysis* (Second edition). *Use R!* Springer.  
960 <https://doi.org/10.1007/978-3-319-24277-4>
- 961 Wong, M. (2010). Too much inhibition leads to excitation in absence epilepsy. *Epilepsy Currents*, 10(5),  
962 131–132. <https://doi.org/10.1111/j.1535-7511.2010.01379.x>
- 963 Zhang, X. S., Roy, R. J., & Jensen, E. W. (2001). Eeg complexity as a measure of depth of anesthesia  
964 for patients. *IEEE Transactions on Bio-Medical Engineering*, 48(12), 1424–1433.  
965 <https://doi.org/10.1109/10.966601>
- 966 Zhu, X., Xu, H., Zhao, J., & Tian, J. (2017). Automated Epileptic Seizure Detection in Scalp EEG Based  
967 on Spatial-Temporal Complexity. *Complexity*, 2017, 1–8. <https://doi.org/10.1155/2017/5674392>
- 968
